# Supplementary material
Source: Research Square preprint supplement (doi:10.21203/rs.3.rs-9436896/v1)
Supplement: Supplementary file 1 [file 00b13385adf1926d1c17c275.xlsx]

## Sheet: ocular diseases
Dataset	Name	Country of origin	Imaging devices	Disease	Number of samples	Proportion	Total
A1	Eyepacs			Mild DR	2443	0.0695496	35126
				Moderate DR	5292	0.150658
				Severe DR	873	0.0248534
				Proliferative DR	708	0.020156
				Control	25810	0.734783
A2	IDRiD	India	VX-10 alpha digital fundus camera (Kowa)	Mild DR	25	0.0484496	516
				Moderate DR	168	0.325581
				Severe DR	93	0.180233
				Proliferative DR	62	0.120155
				Control	168	0.325581
A3	SynFundus-1M			Mild DR	56	5.5999e-05	1000018
				Moderate DR	97882	0.0978802
				Severe DR	51971	0.0519701
				Proliferative DR	45667	0.0456662
				Control	804442	0.804428
A4	Messdior-2	France	TRC-NW6 non-mydriatic fundus camera (Topcon)	Mild DR	270	0.154817	1744
				Moderate DR	347	0.198968
				Severe DR	75	0.0430046
				Proliferative DR	35	0.0200688
				Control	1017	0.583142
A5	APTOS-2019	India	A variety of camera models, not specified	Mild DR	370	0.101038	3662
				Moderate DR	999	0.272802
				Severe DR	193	0.0527034
				Proliferative DR	295	0.0805571
				Control	1805	0.4929
A6	Glaucoma Fundus	South Korea	AFC-330 non-mydriatic auto fundus camera (Nidek)	Early glaucoma	289	0.187176	1544
				Advanced glaucoma	467	0.302461
				Control	788	0.510363
A7	AOD			AMD	2128	0.143658	14813
				Cataract	2344	0.158239
				Diabetes	1608	0.108553
				Glaucoma	2272	0.153379
				Hypertension	1024	0.0691285
				Myopia	1856	0.125295
				Other	708	0.0477959
				Control	2873	0.193951
A8	RetinalOCT	India		AMD	3000	0.125	24000
				CNV	3000	0.125
				CSR	3000	0.125
				DME	3000	0.125
				DR	3000	0.125
				DRUSEN	3000	0.125
				MH	3000	0.125
				Control	3000	0.125

## Sheet: gastric carcinoma
Dataset	Name	Country of origin	Imaging devices	Disease	Number of patients	Proportion	Total	Number of patches	Proportion	Total
GasFMD	TJH-HUST	China		Well differentiated	4	0.0430108	93	33154	0.0550425	602335
				Moderately well differentiated	2	0.0215054		9768	0.0162169
				Moderately differentiated	14	0.150538		125626	0.208565
				Moderately poorly differentiated	31	0.333333		202326	0.335903
				Poorly differentiated	40	0.430108		221860	0.368333
				Unlabelled	2	0.0215054		9601	0.0159396
	JZCH	China		Well differentiated	18	0.0372671	483	22212	0.0808085	274872
				Moderately well differentiated	12	0.0248447		16390	0.0596278
				Moderately differentiated	51	0.10559		41280	0.150179
				Moderately poorly differentiated	59	0.122153		53114	0.193232
				Poorly differentiated	206	0.426501		104864	0.381501
				Unlabelled	137	0.283644		37012	0.134652
B1	KBSMC	South Korea	Aperio digital slide scanner (Leica Biosystems)	Benign	N/A	N/A	98	37271	0.324544	114841
				PD	N/A	N/A		33642	0.292944
				WD	N/A	N/A		18285	0.15922
				MD	N/A	N/A		25643	0.223291
B2	PatchGastricADC22	Japan	Leica Aperio AT2 Digital Whole Slide Scanner	Moderately differentiated tubular adenocarcinoma	265	0.267407	991	73336	0.279081	262777
				Well differentiated tubular adenocarcinoma	283	0.28557		60490	0.230195
				Papillary adenocarcinoma	135	0.136226		37454	0.142532
				Poorly differentiated adenocarcinoma, solid type	68	0.0686176		24466	0.0931056
				Moderately to poorly differentiated adenocarcinoma	81	0.0817356		24378	0.0927707
				Poorly differentiated adenocarcinoma, non-solid type	78	0.0787084		21080	0.0802201
				Well to moderately differentiated tubular adenocarcinoma	61	0.061554		18775	0.0714484
				Signet ring cell carcinoma	17	0.0171544		2046	0.00778607
				Mucinous adenocarcinoma	3	0.00302725		752	0.00286174

## Sheet: lung cancer
Dataset	Name	Country of origin	Imaging devices	Disease	Number of patients	Proportion	Total	Number of images	Proportion	Total
PulFMD	TJH-HUST	China		Squamous cell carcinoma	1182	0.56909	2077	215800	0.195246	1105273
				Adenocarcinoma	597	0.287434		770110	0.69676
				Small cell carcinoma	217	0.104478		41227	0.0373003
				Other	34	0.0163698		5788	0.00523672
				Control	47	0.0226288		72348	0.0654571
C1	Lung cancer			Squamous cell carcinoma	N/A	N/A	N/A	5000	0.333333	15000
				Adenocarcinoma	N/A	N/A		5000	0.333333
				Control	N/A	N/A		5000	0.333333
C2	Lung-pet-ct-dx	China		Squamous cell carcinoma	61	0.174286	350	16265	0.244421	66545
				Adenocarcinoma	251	0.717143		40156	0.603441
				Small cell carcinoma	38	0.108571		10124	0.152138

## Sheet: age and gender distribution
Dataset	Disease	Age	Female	Male	Total	Proportion(%)
PulFMD	Squamous cell carcinoma	31	0	1	1	0.0849618
		33	1	0	1	0.0849618
		34	0	1	1	0.0849618
		35	2	0	2	0.169924
		36	0	1	1	0.0849618
		39	1	0	1	0.0849618
		40	0	1	1	0.0849618
		42	1	2	3	0.254885
		43	1	2	3	0.254885
		44	0	3	3	0.254885
		45	2	6	8	0.679694
		46	0	3	3	0.254885
		47	0	5	5	0.424809
		48	1	5	6	0.509771
		49	3	2	5	0.424809
		50	2	13	15	1.27443
		51	0	8	8	0.679694
		52	4	11	15	1.27443
		53	4	21	25	2.12404
		54	3	28	31	2.63381
		55	3	31	34	2.8887
		56	4	35	39	3.31351
		57	3	36	39	3.31351
		58	6	35	41	3.48343
		59	6	50	56	4.75786
		60	2	57	59	5.01274
		61	4	36	40	3.39847
		62	2	51	53	4.50297
		63	3	50	53	4.50297
		64	2	51	53	4.50297
		65	1	54	55	4.6729
		66	3	55	58	4.92778
		67	2	50	52	4.41801
		68	5	49	54	4.58794
		69	3	54	57	4.84282
		70	2	48	50	4.24809
		71	1	45	46	3.90824
		72	1	36	37	3.14359
		73	0	30	30	2.54885
		74	1	25	26	2.20901
		75	2	26	28	2.37893
		76	1	25	26	2.20901
		77	0	13	13	1.1045
		78	0	13	13	1.1045
		79	0	10	10	0.849618
		80	1	5	6	0.509771
		81	1	3	4	0.339847
		82	0	4	4	0.339847
		83	0	1	1	0.0849618
		84	0	2	2	0.169924
	Adenocarcinoma	23	1	0	1	0.167504
		25	0	1	1	0.167504
		28	0	2	2	0.335008
		29	2	0	2	0.335008
		30	1	1	2	0.335008
		31	4	1	5	0.837521
		32	2	0	2	0.335008
		33	5	4	9	1.50754
		34	4	0	4	0.670017
		35	1	3	4	0.670017
		36	2	2	4	0.670017
		37	4	1	5	0.837521
		38	4	1	5	0.837521
		39	3	2	5	0.837521
		40	5	2	7	1.17253
		41	9	1	10	1.67504
		42	8	1	9	1.50754
		43	8	1	9	1.50754
		44	10	4	14	2.34506
		45	9	8	17	2.84757
		46	9	1	10	1.67504
		47	10	7	17	2.84757
		48	15	2	17	2.84757
		49	12	6	18	3.01508
		50	10	6	16	2.68007
		51	16	3	19	3.18258
		52	24	5	29	4.85762
		53	17	6	23	3.8526
		54	17	14	31	5.19263
		55	10	9	19	3.18258
		56	13	11	24	4.0201
		57	22	6	28	4.69012
		58	13	8	21	3.51759
		59	19	7	26	4.35511
		60	11	8	19	3.18258
		61	11	5	16	2.68007
		62	5	5	10	1.67504
		63	11	7	18	3.01508
		64	14	7	21	3.51759
		65	14	4	18	3.01508
		66	5	9	14	2.34506
		67	6	5	11	1.84255
		68	8	1	9	1.50754
		69	5	7	12	2.01005
		70	5	3	8	1.34003
		71	4	1	5	0.837521
		72	1	2	3	0.502513
		73	2	1	3	0.502513
		74	0	1	1	0.167504
		75	2	0	2	0.335008
		76	1	2	3	0.502513
		77	2	1	3	0.502513
		78	1	1	2	0.335008
		79	0	1	1	0.167504
		80	0	1	1	0.167504
		82	0	1	1	0.167504
		83	0	1	1	0.167504
	Small cell carcinoma	38	0	1	1	0.460829
		39	0	1	1	0.460829
		40	1	2	3	1.38249
		41	0	1	1	0.460829
		42	0	1	1	0.460829
		43	0	1	1	0.460829
		44	0	2	2	0.921659
		46	0	1	1	0.460829
		47	0	5	5	2.30415
		48	0	1	1	0.460829
		50	0	3	3	1.38249
		51	0	3	3	1.38249
		52	2	2	4	1.84332
		53	0	4	4	1.84332
		54	1	2	3	1.38249
		55	1	11	12	5.52995
		56	1	6	7	3.22581
		57	0	11	11	5.06912
		58	0	9	9	4.14747
		59	1	6	7	3.22581
		60	1	16	17	7.8341
		61	1	12	13	5.99078
		62	1	11	12	5.52995
		63	0	10	10	4.60829
		64	3	5	8	3.68664
		65	0	5	5	2.30415
		66	0	8	8	3.68664
		67	0	4	4	1.84332
		68	1	13	14	6.45161
		69	3	5	8	3.68664
		70	1	6	7	3.22581
		71	1	4	5	2.30415
		72	0	5	5	2.30415
		73	0	5	5	2.30415
		74	1	3	4	1.84332
		75	1	2	3	1.38249
		76	1	3	4	1.84332
		77	0	1	1	0.460829
		78	1	2	3	1.38249
		80	1	0	1	0.460829
	Other	13	0	1	1	2.94118
		18	0	1	1	2.94118
		27	0	1	1	2.94118
		28	0	1	1	2.94118
		30	0	1	1	2.94118
		33	1	0	1	2.94118
		35	1	1	2	5.88235
		37	0	2	2	5.88235
		44	1	0	1	2.94118
		46	0	1	1	2.94118
		49	0	2	2	5.88235
		50	1	0	1	2.94118
		54	1	0	1	2.94118
		55	1	0	1	2.94118
		56	0	2	2	5.88235
		57	1	0	1	2.94118
		58	1	0	1	2.94118
		59	1	1	2	5.88235
		60	0	1	1	2.94118
		61	1	2	3	8.82353
		62	0	2	2	5.88235
		63	0	2	2	5.88235
		67	1	0	1	2.94118
		73	0	1	1	2.94118
		78	0	1	1	2.94118
	Control	31	0	1	1	2.12766
		33	1	0	1	2.12766
		34	2	2	4	8.51064
		35	2	0	2	4.25532
		36	3	0	3	6.38298
		37	0	2	2	4.25532
		38	1	0	1	2.12766
		39	1	1	2	4.25532
		40	1	1	2	4.25532
		41	1	2	3	6.38298
		42	0	2	2	4.25532
		43	2	0	2	4.25532
		44	0	1	1	2.12766
		45	0	2	2	4.25532
		46	0	1	1	2.12766
		47	2	0	2	4.25532
		48	2	2	4	8.51064
		49	1	0	1	2.12766
		50	1	1	2	4.25532
		51	2	1	3	6.38298
		52	1	0	1	2.12766
		55	1	1	2	4.25532
		56	1	0	1	2.12766
		57	1	0	1	2.12766
		60	0	1	1	2.12766
GasFMD	Well differentiated	50	0	1	1	4.54545
		56	0	1	1	4.54545
		57	0	1	1	4.54545
		61	2	0	2	9.09091
		63	0	1	1	4.54545
		64	0	2	2	9.09091
		65	0	1	1	4.54545
		66	0	1	1	4.54545
		68	0	2	2	9.09091
		69	1	0	1	4.54545
		72	1	2	3	13.6364
		73	0	1	1	4.54545
		75	0	1	1	4.54545
		76	0	1	1	4.54545
		78	0	1	1	4.54545
		84	1	1	2	9.09091
	Moderately well differentiated	47	1	0	1	7.14286
		50	0	1	1	7.14286
		54	0	2	2	14.2857
		59	0	1	1	7.14286
		62	0	1	1	7.14286
		63	0	1	1	7.14286
		64	0	1	1	7.14286
		66	0	1	1	7.14286
		69	1	0	1	7.14286
		70	0	1	1	7.14286
		71	0	2	2	14.2857
		72	0	1	1	7.14286
	Moderately differentiated	50	0	1	1	1.53846
		52	1	1	2	3.07692
		53	0	2	2	3.07692
		54	0	2	2	3.07692
		55	1	1	2	3.07692
		56	1	1	2	3.07692
		57	0	1	1	1.53846
		58	0	1	1	1.53846
		59	1	3	4	6.15385
		60	0	2	2	3.07692
		61	2	1	3	4.61538
		62	0	4	4	6.15385
		63	1	1	2	3.07692
		64	0	1	1	1.53846
		65	0	3	3	4.61538
		66	1	6	7	10.7692
		67	0	6	6	9.23077
		68	0	3	3	4.61538
		69	0	3	3	4.61538
		70	0	3	3	4.61538
		73	1	2	3	4.61538
		76	1	2	3	4.61538
		78	0	3	3	4.61538
		80	1	1	2	3.07692
	Moderately poorly differentiated	44	1	0	1	1.11111
		47	0	1	1	1.11111
		48	1	1	2	2.22222
		50	1	0	1	1.11111
		51	1	0	1	1.11111
		52	1	4	5	5.55556
		54	0	2	2	2.22222
		55	2	3	5	5.55556
		56	1	0	1	1.11111
		57	1	2	3	3.33333
		58	0	3	3	3.33333
		59	2	2	4	4.44444
		60	3	0	3	3.33333
		61	0	2	2	2.22222
		62	1	0	1	1.11111
		63	1	2	3	3.33333
		64	0	3	3	3.33333
		65	1	2	3	3.33333
		66	0	3	3	3.33333
		67	0	4	4	4.44444
		68	1	4	5	5.55556
		69	1	1	2	2.22222
		70	3	2	5	5.55556
		72	0	4	4	4.44444
		73	0	1	1	1.11111
		74	1	3	4	4.44444
		75	1	1	2	2.22222
		76	1	2	3	3.33333
		77	0	5	5	5.55556
		78	1	2	3	3.33333
		79	0	1	1	1.11111
		81	1	0	1	1.11111
		82	0	1	1	1.11111
		83	0	1	1	1.11111
		84	0	1	1	1.11111
	Poorly differentiated	31	1	0	1	0.406504
		32	1	0	1	0.406504
		37	3	1	4	1.62602
		41	0	2	2	0.813008
		42	1	0	1	0.406504
		43	2	1	3	1.21951
		45	1	0	1	0.406504
		46	4	1	5	2.03252
		47	1	5	6	2.43902
		48	1	0	1	0.406504
		49	4	0	4	1.62602
		50	0	1	1	0.406504
		51	4	3	7	2.84553
		52	3	6	9	3.65854
		53	2	2	4	1.62602
		54	4	4	8	3.25203
		55	3	2	5	2.03252
		56	7	1	8	3.25203
		57	2	7	9	3.65854
		58	5	4	9	3.65854
		59	4	3	7	2.84553
		60	1	6	7	2.84553
		61	2	4	6	2.43902
		62	2	4	6	2.43902
		63	2	6	8	3.25203
		64	3	11	14	5.69106
		65	3	6	9	3.65854
		66	2	8	10	4.06504
		67	4	9	13	5.28455
		68	1	5	6	2.43902
		69	2	11	13	5.28455
		70	0	8	8	3.25203
		71	4	3	7	2.84553
		72	3	2	5	2.03252
		73	2	1	3	1.21951
		74	2	4	6	2.43902
		75	2	2	4	1.62602
		76	0	5	5	2.03252
		77	4	6	10	4.06504
		79	0	3	3	1.21951
		80	1	2	3	1.21951
		81	2	0	2	0.813008
		84	0	1	1	0.406504
		Unknown	0	1	1	0.406504
	Unlabelled	40	1	0	1	0.719424
		45	1	0	1	0.719424
		47	1	1	2	1.43885
		49	0	2	2	1.43885
		50	1	2	3	2.15827
		51	0	1	1	0.719424
		52	1	1	2	1.43885
		53	0	1	1	0.719424
		55	2	2	4	2.8777
		56	1	1	2	1.43885
		57	1	3	4	2.8777
		58	1	3	4	2.8777
		59	2	4	6	4.31655
		60	1	3	4	2.8777
		61	0	5	5	3.59712
		62	1	7	8	5.7554
		63	2	2	4	2.8777
		64	1	0	1	0.719424
		65	1	7	8	5.7554
		66	0	6	6	4.31655
		67	1	3	4	2.8777
		68	1	8	9	6.47482
		69	2	4	6	4.31655
		70	1	7	8	5.7554
		71	1	4	5	3.59712
		72	1	4	5	3.59712
		73	1	1	2	1.43885
		74	3	4	7	5.03597
		75	0	5	5	3.59712
		76	3	2	5	3.59712
		77	0	2	2	1.43885
		78	0	3	3	2.15827
		79	2	3	5	3.59712
		80	0	1	1	0.719424
		83	1	0	1	0.719424
		84	1	1	2	1.43885
