# Supplementary material
Source: Research Square preprint supplement (doi:10.21203/rs.3.rs-9436896/v1)
Supplement: Supplementary file 2 [file 9ddcd5de59cd0e8ef790c623.xlsx]

## Sheet: ocular diseases
Figures	Predictionof	Dataset	Numberofsamples	D1(NmildDR):D2(moderateDR):D3(severeDR):D4(proliferativeDR):G1(earlyglaucoma):G2(advancedglaucomar):N(noDRorglaucoma)
				Node1	Node2	Node3	Node4	Node5	Center
Fig.3c	oculardiseases	OphFMD	1035660	18494:18494:18494:18494:18494:18494:18494 (14.29%/14.29%/14.29%/14.29%/14.29%/14.29%/14.29%)	18494:18494:18494:18494:18494:18494:18494 (14.29%/14.29%/14.29%/14.29%/14.29%/14.29%/14.29%)	18494:18494:18494:18494:18494:18494:18493 (14.29%/14.29%/14.29%/14.29%/14.29%/14.29%/14.29%)	18494:18494:18494:18494:18494:18494:18493 (14.29%/14.29%/14.29%/14.29%/14.29%/14.29%/14.29%)	/	73976:73976:73976:73976:73976:73975:73975 (14.29%/14.29%/14.29%/14.29%/14.29%/14.29%/14.29%)
EDFig.3a	oculardiseases	OphFMD	1035660	64729:10789:10788:10788:10788:10788:10788 (50.00%/8.33%/8.33%/8.33%/8.33%/8.33%/8.33%)	10789:64729:10788:10788:10788:10788:10788 (8.33%/50.00%/8.33%/8.33%/8.33%/8.33%/8.33%)	10789:10788:64728:10788:10788:10788:10788 (8.33%/8.33%/50.00%/8.33%/8.33%/8.33%/8.33%)	10789:10788:10788:64728:10788:10788:10788 (8.33%/8.33%/8.33%/50.00%/8.33%/8.33%/8.33%)	/	73976:73976:73976:73976:73976:73975:73975 (14.29%/14.29%/14.29%/14.29%/14.29%/14.29%/14.29%)
EDFig.3g	oculardiseases	OphFMD	1035660	7398:7398:7398:7398:7397:7397:7397 (14.29%/14.29%/14.29%/14.29%/14.28%/14.28%/14.28%)	14796:14795:14795:14795:14795:14795:14795 (14.29%/14.29%/14.29%/14.29%/14.29%/14.29%/14.29%)	22193:22193:22193:22193:22193:22192:22192 (14.29%/14.29%/14.29%/14.29%/14.29%/14.29%/14.29%)	29591:29591:29590:29590:29590:29590:29590 (14.29%/14.29%/14.29%/14.29%/14.29%/14.29%/14.29%)	/	73976:73976:73976:73976:73976:73975:73975 (14.29%/14.29%/14.29%/14.29%/14.29%/14.29%/14.29%)
EDFig.3m	oculardiseases	OphFMD	1035660	25891:4316:4316:4315:4315:4315:4315 (50.00%/8.33%/8.33%/8.33%/8.33%/8.33%/8.33%)	8631:51783:8631:8631:8630:8630:8630 (8.33%/50.00%/8.33%/8.33%/8.33%/8.33%/8.33%)	12946:12946:77674:12946:12946:12946:12945 (8.33%/8.33%/50.00%/8.33%/8.33%/8.33%/8.33%)	17261:17261:17261:103566:17261:17261:17261 (8.33%/8.33%/8.33%/50.00%/8.33%/8.33%/8.33%)	/	73976:73976:73976:73976:73976:73975:73975 (14.29%/14.29%/14.29%/14.29%/14.29%/14.29%/14.29%)
Fig.6a	oculardiseases	OphFMD	1035660	14796:14795:14795:14795:14795:14795:14795 (14.29%/14.29%/14.29%/14.29%/14.29%/14.29%/14.29%)	22193:22193:22193:22193:22193:22192:22192 (14.29%/14.29%/14.29%/14.29%/14.29%/14.29%/14.29%)	36988:36988:36988:36988:36988:36988:36987 (14.29%/14.29%/14.29%/14.29%/14.29%/14.29%/14.29%)	/	/	73976:73976:73976:73976:73976:73975:73975 (14.29%/14.29%/14.29%/14.29%/14.29%/14.29%/14.29%)
Fig.6b	oculardiseases	OphFMD	1035660	7398:7398:7398:7398:7397:7397:7397 (14.29%/14.29%/14.29%/14.29%/14.28%/14.28%/14.28%)	11097:11097:11096:11096:11096:11096:11096 (14.29%/14.29%/14.29%/14.29%/14.29%/14.29%/14.29%)	14796:14795:14795:14795:14795:14795:14795 (14.29%/14.29%/14.29%/14.29%/14.29%/14.29%/14.29%)	18494:18494:18494:18494:18494:18494:18493 (14.29%/14.29%/14.29%/14.29%/14.29%/14.29%/14.29%)	22193:22193:22193:22193:22193:22193:22192 (14.29%/14.29%/14.29%/14.29%/14.29%/14.29%/14.29%)	73976:73976:73976:73976:73976:73975:73975 (14.29%/14.29%/14.29%/14.29%/14.29%/14.29%/14.29%)
Fig.6f	oculardiseases	OphFMD	1035660	86305:14385:14384:14384:14384:14384:14384 (50.00%/8.33%/8.33%/8.33%/8.33%/8.33%/8.33%)	14385:86305:14384:14384:14384:14384:14384 (8.33%/50.00%/8.33%/8.33%/8.33%/8.33%/8.33%)	14385:14384:86305:14384:14384:14384:14384 (8.33%/8.33%/50.00%/8.33%/8.33%/8.33%/8.33%)	/	/	73976:73976:73976:73976:73976:73975:73975 (14.29%/14.29%/14.29%/14.29%/14.29%/14.29%/14.29%)
Fig.6g	oculardiseases	OphFMD	1035660	51783:8631:8631:8631:8630:8630:8630 (50.00%/8.33%/8.33%/8.33%/8.33%/8.33%/8.33%)	8631:51783:8631:8631:8630:8630:8630 (8.33%/50.00%/8.33%/8.33%/8.33%/8.33%/8.33%)	8631:8631:51783:8631:8630:8630:8630 (8.33%/8.33%/50.00%/8.33%/8.33%/8.33%/8.33%)	8631:8631:8631:51783:8630:8630:8630 (8.33%/8.33%/8.33%/50.00%/8.33%/8.33%/8.33%)	8631:8631:8631:8630:51783:8630:8630 (8.33%/8.33%/8.33%/8.33%/50.00%/8.33%/8.33%)	73976:73976:73976:73976:73976:73975:73975 (14.29%/14.29%/14.29%/14.29%/14.29%/14.29%/14.29%)
Fig.6k	oculardiseases	OphFMD	1035660	51783:8631:8631:8631:8630:8630:8630 (50.00%/8.33%/8.33%/8.33%/8.33%/8.33%/8.33%)	12946:77674:12946:12946:12946:12946:12945 (8.33%/50.00%/8.33%/8.33%/8.33%/8.33%/8.33%)	21577:21577:129457:21576:21576:21576:21576 (8.33%/8.33%/50.00%/8.33%/8.33%/8.33%/8.33%)	/	/	73976:73976:73976:73976:73976:73975:73975 (14.29%/14.29%/14.29%/14.29%/14.29%/14.29%/14.29%)
Fig.6l	oculardiseases	OphFMD	1035660	25891:4316:4316:4315:4315:4315:4315 (50.00%/8.33%/8.33%/8.33%/8.33%/8.33%/8.33%)	6473:38837:6473:6473:6473:6473:6472 (8.33%/50.00%/8.33%/8.33%/8.33%/8.33%/8.33%)	8631:8631:51783:8631:8630:8630:8630 (8.33%/8.33%/50.00%/8.33%/8.33%/8.33%/8.33%)	10789:10788:10788:64728:10788:10788:10788 (8.33%/8.33%/8.33%/50.00%/8.33%/8.33%/8.33%)	12946:12946:12946:12946:77675:12946:12945 (8.33%/8.33%/8.33%/8.33%/50.00%/8.33%/8.33%)	73976:73976:73976:73976:73976:73975:73975 (14.29%/14.29%/14.29%/14.29%/14.29%/14.29%/14.29%)
EDFig.9a	oculardiseases	OphFMD+A4A5	1041066	86756:14460:14459:14459:14459:14459:14459 (50.00%/8.33%/8.33%/8.33%/8.33%/8.33%/8.33%)	14460:86756:14459:14459:14459:14459:14459 (8.33%/50.00%/8.33%/8.33%/8.33%/8.33%/8.33%)	14460:14459:86756:14459:14459:14459:14459 (8.33%/8.33%/50.00%/8.33%/8.33%/8.33%/8.33%)	/	/	74362:74362:74362:74362:74362:74362:74361 (14.29%/14.29%/14.29%/14.29%/14.29%/14.29%/14.29%)
EDFig.9b	oculardiseases	OphFMD+A4A5	1041066	65067:10845:10845:10845:10844:10844:10844 (50.00%/8.33%/8.33%/8.33%/8.33%/8.33%/8.33%)	10845:65066:10845:10845:10844:10844:10844 (8.33%/50.00%/8.33%/8.33%/8.33%/8.33%/8.33%)	10845:10845:65066:10845:10844:10844:10844 (8.33%/8.33%/50.00%/8.33%/8.33%/8.33%/8.33%)	10845:10845:10845:65066:10844:10844:10844 (8.33%/8.33%/8.33%/50.00%/8.33%/8.33%/8.33%)	/	74362:74362:74362:74362:74362:74362:74361 (14.29%/14.29%/14.29%/14.29%/14.29%/14.29%/14.29%)
EDFig.9c	oculardiseases	OphFMD+A4A5	1041066	52053:8676:8676:8676:8676:8675:8675 (50.00%/8.33%/8.33%/8.33%/8.33%/8.33%/8.33%)	8676:52053:8676:8676:8676:8675:8675 (8.33%/50.00%/8.33%/8.33%/8.33%/8.33%/8.33%)	8676:8676:52053:8676:8676:8675:8675 (8.33%/8.33%/50.00%/8.33%/8.33%/8.33%/8.33%)	8676:8676:8676:52053:8675:8675:8675 (8.33%/8.33%/8.33%/50.00%/8.33%/8.33%/8.33%)	8676:8676:8676:8675:52053:8675:8675 (8.33%/8.33%/8.33%/8.33%/50.00%/8.33%/8.33%)	74362:74362:74362:74362:74362:74362:74361 (14.29%/14.29%/14.29%/14.29%/14.29%/14.29%/14.29%)
EDFig.9g	oculardiseases	OphFMD+A4A5	1041066	14873:14873:14872:14872:14872:14872:14872 (14.29%/14.29%/14.29%/14.29%/14.29%/14.29%/14.29%)	22309:22309:22309:22308:22308:22308:22308 (14.29%/14.29%/14.29%/14.29%/14.29%/14.29%/14.29%)	37182:37181:37181:37181:37181:37181:37181 (14.29%/14.29%/14.29%/14.29%/14.29%/14.29%/14.29%)	/	/	74362:74362:74362:74362:74362:74362:74361 (14.29%/14.29%/14.29%/14.29%/14.29%/14.29%/14.29%)
EDFig.9h	oculardiseases	OphFMD+A4A5	1041066	7437:7436:7436:7436:7436:7436:7436 (14.29%/14.29%/14.29%/14.28%/14.28%/14.28%/14.28%)	14873:14873:14872:14872:14872:14872:14872 (14.29%/14.29%/14.29%/14.29%/14.29%/14.29%/14.29%)	22309:22309:22309:22308:22308:22308:22308 (14.29%/14.29%/14.29%/14.29%/14.29%/14.29%/14.29%)	29745:29745:29745:29745:29745:29745:29745 (14.29%/14.29%/14.29%/14.29%/14.29%/14.29%/14.29%)	/	74362:74362:74362:74362:74362:74362:74361 (14.29%/14.29%/14.29%/14.29%/14.29%/14.29%/14.29%)
EDFig.9i	oculardiseases	OphFMD+A4A5	1041066	7437:7436:7436:7436:7436:7436:7436 (14.29%/14.29%/14.29%/14.28%/14.28%/14.28%/14.28%)	11155:11154:11154:11154:11154:11154:11154 (14.29%/14.29%/14.29%/14.29%/14.29%/14.29%/14.29%)	14873:14873:14872:14872:14872:14872:14872 (14.29%/14.29%/14.29%/14.29%/14.29%/14.29%/14.29%)	18591:18591:18591:18590:18590:18590:18590 (14.29%/14.29%/14.29%/14.29%/14.29%/14.29%/14.29%)	22309:22309:22309:22309:22309:22309:22308 (14.29%/14.29%/14.29%/14.29%/14.29%/14.29%/14.29%)	74362:74362:74362:74362:74362:74362:74361 (14.29%/14.29%/14.29%/14.29%/14.29%/14.29%/14.29%)
EDFig.9m	oculardiseases	OphFMD+A4A5	1041066	52053:8676:8676:8676:8675:8675:8675 (50.00%/8.33%/8.33%/8.33%/8.33%/8.33%/8.33%)	13014:78080:13013:13013:13013:13013:13013 (8.33%/50.00%/8.33%/8.33%/8.33%/8.33%/8.33%)	21689:21689:130134:21689:21689:21689:21689 (8.33%/8.33%/50.00%/8.33%/8.33%/8.33%/8.33%)	/	/	74362:74362:74362:74362:74362:74362:74361 (14.29%/14.29%/14.29%/14.29%/14.29%/14.29%/14.29%)
EDFig.9n	oculardiseases	OphFMD+A4A5	1041066	26026:4338:4338:4338:4338:4338:4337 (50.00%/8.33%/8.33%/8.33%/8.33%/8.33%/8.33%)	8676:52053:8676:8676:8675:8675:8675 (8.33%/50.00%/8.33%/8.33%/8.33%/8.33%/8.33%)	13014:13013:78080:13013:13013:13013:13013 (8.33%/8.33%/50.00%/8.33%/8.33%/8.33%/8.33%)	17352:17351:17351:104108:17351:17351:17351 (8.33%/8.33%/8.33%/50.00%/8.33%/8.33%/8.33%)	/	74362:74362:74362:74362:74362:74362:74361 (14.29%/14.29%/14.29%/14.29%/14.29%/14.29%/14.29%)
EDFig.9o	oculardiseases	OphFMD+A4A5	1041066	26026:4338:4338:4338:4338:4338:4337 (50.00%/8.33%/8.33%/8.33%/8.33%/8.33%/8.33%)	6507:39039:6507:6507:6507:6506:6506 (8.33%/50.00%/8.33%/8.33%/8.33%/8.33%/8.33%)	8676:8676:52053:8676:8675:8675:8675 (8.33%/8.33%/50.00%/8.33%/8.33%/8.33%/8.33%)	10845:10845:10844:65067:10844:10844:10844 (8.33%/8.33%/8.33%/50.00%/8.33%/8.33%/8.33%)	13014:13014:13014:13013:78081:13013:13013 (8.33%/8.33%/8.33%/8.33%/50.00%/8.33%/8.33%)	74362:74362:74362:74362:74362:74362:74361 (14.29%/14.29%/14.29%/14.29%/14.29%/14.29%/14.29%)

## Sheet: gastric carcinoma
Figures	Prediction of	Dataset	Number of samples	well-to-moderately differentiated (D1–D3):D4(Moderately poorly differentiated):D5(Poorly differentiated)
				Node 1	Node 2	Node 3	Node 4	Center
Fig. 4c	gastric carcinoma	GasFMD	830594	34609:34608:34608 (33.33%/33.33%/33.33%)	34608:34608:34608 (33.33%/33.33%/33.33%)	34608:34608:34608 (33.33%/33.33%/33.33%)	34608:34608:34608 (33.33%/33.33%/33.33%)	138433:138432:138432 (33.33%/33.33%/33.33%)
ED Fig. 6a	gastric carcinoma	GasFMD	830594	51912:25957:25956 (50.00%/25.00%/25.00%)	25956:51912:25956 (25.00%/50.00%/25.00%)	25956:25956:51912 (25.00%/25.00%/50.00%)	51912:25956:25956 (50.00%/25.00%/25.00%)	138433:138432:138432 (33.33%/33.33%/33.33%)
ED Fig. 6d	gastric carcinoma	GasFMD	830594	13843:13843:13843 (33.33%/33.33%/33.33%)	27687:27686:27686 (33.33%/33.33%/33.33%)	41530:41530:41529 (33.33%/33.33%/33.33%)	55374:55373:55373 (33.33%/33.33%/33.33%)	138433:138432:138432 (33.33%/33.33%/33.33%)
ED Fig. 6g	gastric carcinoma	GasFMD	830594	20764:10383:10382 (50.00%/25.00%/25.00%)	20765:41529:20765 (25.00%/50.00%/25.00%)	31148:31147:62294 (25.00%/25.00%/50.00%)	83060:41530:41530 (50.00%/25.00%/25.00%)	138433:138432:138432 (33.33%/33.33%/33.33%)

## Sheet: lung cancer
Figures	Prediction of	Dataset	Number of samples	C1(Squamous cell carcinoma):C2(Adenocarcinoma):C3(Small cell carcinoma):N(Normal)
				Node 1	Node 2	Node 3	Node 4	Node 5	Center
Fig. 5c	lung cancer	PulFMD	1105272	34540:34540:34540:34539 (25.00%/25.00%/25.00%/25.00%)	34540:34540:34540:34539 (25.00%/25.00%/25.00%/25.00%)	34540:34540:34540:34539 (25.00%/25.00%/25.00%/25.00%)	34540:34540:34540:34539 (25.00%/25.00%/25.00%/25.00%)	/	138159:138159:138159:138159 (25.00%/25.00%/25.00%/25.00%)
ED Fig. 8a	lung cancer	PulFMD	1105272	69079:23027:23027:23026 (50.00%/16.67%/16.67%/16.67%)	23027:69079:23027:23026 (16.67%/50.00%/16.67%/16.67%)	23027:23027:69079:23026 (16.67%/16.67%/50.00%/16.67%)	23027:23027:23026:69079 (16.67%/16.67%/16.67%/50.00%)	/	138159:138159:138159:138159 (25.00%/25.00%/25.00%/25.00%)
ED Fig. 8d	lung cancer	PulFMD	1105272	13816:13816:13816:13815 (25.00%/25.00%/25.00%/25.00%)	27632:27632:27632:27631 (25.00%/25.00%/25.00%/25.00%)	41448:41448:41447:41447 (25.00%/25.00%/25.00%/25.00%)	55264:55264:55264:55264 (25.00%/25.00%/25.00%/25.00%)	/	138159:138159:138159:138159 (25.00%/25.00%/25.00%/25.00%)
ED Fig. 8g	lung cancer	PulFMD	1105272	27631:9211:9211:9210 (50.00%/16.67%/16.67%/16.67%)	18422:55263:18421:18421 (16.67%/50.00%/16.67%/16.67%)	27632:27632:82895:27631 (16.67%/16.67%/50.00%/16.67%)	36843:36843:36842:110528 (16.67%/16.67%/16.67%/50.00%)	/	138159:138159:138159:138159 (25.00%/25.00%/25.00%/25.00%)
ED Fig. 10a	lung cancer	PulFMD	1105272	92106:30702:30702:30702 (50.00%/16.67%/16.67%/16.67%)	30702:92106:30702:30702 (16.67%/50.00%/16.67%/16.67%)	30702:30702:92106:30702 (16.67%/16.67%/50.00%/16.67%)	/	/	138159:138159:138159:138159 (25.00%/25.00%/25.00%/25.00%)
ED Fig. 10b	lung cancer	PulFMD	1105272	55264:18422:18421:18421 (50.00%/16.67%/16.67%/16.67%)	18422:55263:18421:18421 (16.67%/50.00%/16.67%/16.67%)	18422:18421:55263:18421 (16.67%/16.67%/50.00%/16.67%)	18422:18421:18421:55263 (16.67%/16.67%/16.67%/50.00%)	55263:18422:18421:18421 (50.00%/16.67%/16.67%/16.67%)	138159:138159:138159:138159 (25.00%/25.00%/25.00%/25.00%)
ED Fig. 10d	lung cancer	PulFMD	1105272	27632:27632:27632:27631 (25.00%/25.00%/25.00%/25.00%)	41448:41448:41447:41447 (25.00%/25.00%/25.00%/25.00%)	69080:69080:69080:69079 (25.00%/25.00%/25.00%/25.00%)	/	/	138159:138159:138159:138159 (25.00%/25.00%/25.00%/25.00%)
ED Fig. 10e	lung cancer	PulFMD	1105272	13816:13816:13816:13815 (25.00%/25.00%/25.00%/25.00%)	20724:20724:20724:20723 (25.00%/25.00%/25.00%/25.00%)	27632:27632:27632:27631 (25.00%/25.00%/25.00%/25.00%)	34540:34540:34540:34539 (25.00%/25.00%/25.00%/25.00%)	41448:41448:41448:41448 (25.00%/25.00%/25.00%/25.00%)	138159:138159:138159:138159 (25.00%/25.00%/25.00%/25.00%)
ED Fig. 10g	lung cancer	PulFMD	1105272	55263:18422:18421:18421 (50.00%/16.67%/16.67%/16.67%)	27632:82895:27632:27631 (16.67%/50.00%/16.67%/16.67%)	46054:46053:138159:46053 (16.67%/16.67%/50.00%/16.67%)	/	/	138159:138159:138159:138159 (25.00%/25.00%/25.00%/25.00%)
ED Fig. 10h	lung cancer	PulFMD	1105272	27631:9211:9211:9210 (50.00%/16.67%/16.67%/16.67%)	13816:41447:13816:13816 (16.67%/50.00%/16.67%/16.67%)	18422:18421:55263:18421 (16.67%/16.67%/50.00%/16.67%)	23027:23027:23026:69079 (16.67%/16.67%/16.67%/50.00%)	82896:27632:27632:27632 (50.00%/16.67%/16.67%/16.67%)	138159:138159:138159:138159 (25.00%/25.00%/25.00%/25.00%)
ED Fig. 11a	lung cancer	PulFMD+C2	1171818	97651:32551:32551:32550 (50.00%/16.67%/16.67%/16.67%)	32551:97651:32551:32550 (16.67%/50.00%/16.67%/16.67%)	32551:32551:97651:32550 (16.67%/16.67%/50.00%/16.67%)	/	/	146478:146477:146477:146477 (25.00%/25.00%/25.00%/25.00%)
ED Fig. 11b	lung cancer	PulFMD+C2	1171818	73239:24413:24413:24413 (50.00%/16.67%/16.67%/16.67%)	24413:73238:24413:24413 (16.67%/50.00%/16.67%/16.67%)	24413:24413:73238:24413 (16.67%/16.67%/50.00%/16.67%)	24413:24413:24413:73238 (16.67%/16.67%/16.67%/50.00%)	/	146478:146477:146477:146477 (25.00%/25.00%/25.00%/25.00%)
ED Fig. 11c	lung cancer	PulFMD+C2	1171818	58591:19531:19530:19530 (50.00%/16.67%/16.67%/16.67%)	19531:58591:19530:19530 (16.67%/50.00%/16.67%/16.67%)	19531:19530:58591:19530 (16.67%/16.67%/50.00%/16.67%)	19531:19530:19530:58591 (16.67%/16.67%/16.67%/50.00%)	58590:19531:19530:19530 (50.00%/16.67%/16.67%/16.67%)	146478:146477:146477:146477 (25.00%/25.00%/25.00%/25.00%)
ED Fig. 11d	lung cancer	PulFMD+C2	1171818	29296:29295:29295:29295 (25.00%/25.00%/25.00%/25.00%)	43943:43943:43943:43943 (25.00%/25.00%/25.00%/25.00%)	73239:73239:73239:73239 (25.00%/25.00%/25.00%/25.00%)	/	/	146478:146477:146477:146477 (25.00%/25.00%/25.00%/25.00%)
ED Fig. 11e	lung cancer	PulFMD+C2	1171818	14648:14648:14647:14647 (25.00%/25.00%/25.00%/25.00%)	29296:29295:29295:29295 (25.00%/25.00%/25.00%/25.00%)	43943:43943:43943:43943 (25.00%/25.00%/25.00%/25.00%)	58592:58592:58591:58591 (25.00%/25.00%/25.00%/25.00%)	/	146478:146477:146477:146477 (25.00%/25.00%/25.00%/25.00%)
ED Fig. 11f	lung cancer	PulFMD+C2	1171818	14648:14648:14647:14647 (25.00%/25.00%/25.00%/25.00%)	21972:21972:21971:21971 (25.00%/25.00%/25.00%/25.00%)	29296:29295:29295:29295 (25.00%/25.00%/25.00%/25.00%)	36620:36619:36619:36619 (25.00%/25.00%/25.00%/25.00%)	43944:43944:43944:43943 (25.00%/25.00%/25.00%/25.00%)	146478:146477:146477:146477 (25.00%/25.00%/25.00%/25.00%)
ED Fig. 11g	lung cancer	PulFMD+C2	1171818	58590:19531:19530:19530 (50.00%/16.67%/16.67%/16.67%)	29296:87886:29295:29295 (16.67%/50.00%/16.67%/16.67%)	48826:48826:146478:48826 (16.67%/16.67%/50.00%/16.67%)	/	/	146478:146477:146477:146477 (25.00%/25.00%/25.00%/25.00%)
ED Fig. 11h	lung cancer	PulFMD+C2	1171818	29295:9765:9765:9765 (50.00%/16.67%/16.67%/16.67%)	19531:58590:19530:19530 (16.67%/50.00%/16.67%/16.67%)	29296:29295:87886:29295 (16.67%/16.67%/50.00%/16.67%)	39061:39061:39061:117183 (16.67%/16.67%/16.67%/50.00%)	/	146478:146477:146477:146477 (25.00%/25.00%/25.00%/25.00%)
ED Fig. 11i	lung cancer	PulFMD+C2	1171818	29295:9765:9765:9765 (50.00%/16.67%/16.67%/16.67%)	14648:43943:14648:14647 (16.67%/50.00%/16.67%/16.67%)	19531:19530:58590:19530 (16.67%/16.67%/50.00%/16.67%)	24413:24413:24413:73238 (16.67%/16.67%/16.67%/50.00%)	87887:29296:29296:29296 (50.00%/16.67%/16.67%/16.67%)	146478:146477:146477:146477 (25.00%/25.00%/25.00%/25.00%)
