# Supplementary material
Source: Research Square preprint supplement (doi:10.21203/rs.3.rs-9436896/v1)
Supplement: Supplementary file 3 [file a48e08b7e6aee7bef3cf4bbe.xlsx]

## Sheet: sheet 1
Figure	Dataset	model	index	AUROC	AUPR	Precision	Accuracy	F1 Score	Sensitivity	Specificity
Fig. 3d	A4	RETFound	1	0.706274	0.32161	0.406948	0.332256	0.344107	0.332256	0.852037
			2	0.704177	0.325368	0.343475	0.363928	0.349263	0.363928	0.860489
			3	0.723772	0.336813	0.386229	0.364017	0.372272	0.364017	0.856735
			4	0.70225	0.293995	0.313584	0.293557	0.298061	0.293557	0.845638
			5	0.699996	0.320926	0.394321	0.358233	0.370533	0.358233	0.861257
			average	0.707294	0.319743	0.368912	0.342398	0.346847	0.342398	0.855231
		BiomedGPT	1	0.807259	0.426049	0.538813	0.428212	0.45726	0.428212	0.878803
			2	0.818865	0.453235	0.547442	0.43163	0.46045	0.43163	0.875487
			3	0.778995	0.447566	0.556483	0.43316	0.472313	0.43316	0.870528
			4	0.815055	0.446174	0.513702	0.458076	0.479546	0.458076	0.873185
			5	0.81028	0.443504	0.539046	0.446045	0.478374	0.446045	0.873589
			average	0.806091	0.443305	0.539097	0.439424	0.469588	0.439424	0.874318
		F2Med	1	0.877955	0.632086	0.645797	0.715013	0.617292	0.595311	0.90367
			2	0.869962	0.647524	0.686012	0.71374	0.656413	0.632608	0.906545
			3	0.875992	0.630204	0.654344	0.706107	0.610826	0.582353	0.902925
			4	0.872073	0.63136	0.663749	0.71374	0.649784	0.637339	0.904922
			5	0.875709	0.617298	0.632279	0.70229	0.5873	0.560673	0.899109
			average	0.874338	0.631695	0.656436	0.710178	0.624323	0.601657	0.903434
Fig. 3e	A5	RETFound	1	0.852741	0.483819	0.514493	0.510267	0.510471	0.510267	0.927121
			2	0.859321	0.496666	0.512099	0.511734	0.508716	0.511734	0.925827
			3	0.857403	0.484345	0.513269	0.51421	0.507044	0.51421	0.927397
			4	0.867811	0.50684	0.528454	0.523383	0.525019	0.523383	0.928813
			5	0.86614	0.493489	0.49694	0.507201	0.500424	0.507201	0.926544
			average	0.860683	0.493032	0.513051	0.513359	0.510335	0.513359	0.927141
		BiomedGPT	1	0.911908	0.621083	0.676592	0.620663	0.640398	0.620663	0.950527
			2	0.911955	0.616512	0.65773	0.634792	0.64405	0.634792	0.950701
			3	0.908083	0.604633	0.628052	0.618565	0.622787	0.618565	0.947478
			4	0.917386	0.619841	0.640396	0.605062	0.618103	0.605062	0.94943
			5	0.911641	0.620384	0.671362	0.610831	0.63081	0.610831	0.951305
			average	0.912194	0.616491	0.654826	0.617983	0.63123	0.617983	0.949888
		F2Med	1	0.942477	0.686646	0.666327	0.813718	0.67398	0.685153	0.954172
			2	0.941939	0.691814	0.672348	0.816836	0.677711	0.685303	0.954741
			3	0.938727	0.679283	0.683689	0.820733	0.682798	0.683718	0.954752
			4	0.941711	0.684906	0.669988	0.812938	0.678278	0.691085	0.954138
			5	0.937748	0.676401	0.669416	0.814497	0.671676	0.675215	0.953488
			average	0.94052	0.68381	0.672354	0.815744	0.676888	0.684095	0.954258
Fig. 3f	A6	RETFound	1	0.907577	0.779009	0.740554	0.742341	0.74143	0.742341	0.889999
			2	0.921565	0.818869	0.755779	0.776269	0.762857	0.776269	0.902482
			3	0.910597	0.790113	0.735399	0.734853	0.735123	0.734853	0.886033
			4	0.926614	0.819614	0.755348	0.762348	0.757566	0.762348	0.901759
			5	0.912331	0.793518	0.729677	0.737365	0.731764	0.737365	0.888646
			average	0.915737	0.800224	0.743351	0.750635	0.745748	0.750635	0.893784
		BiomedGPT	1	0.918502	0.796553	0.747602	0.770686	0.754847	0.770686	0.897617
			2	0.915304	0.783864	0.754398	0.778183	0.761314	0.778183	0.902019
			3	0.911477	0.78545	0.726208	0.736155	0.729757	0.736155	0.884984
			4	0.913208	0.799383	0.737051	0.738743	0.737862	0.738743	0.889881
			5	0.924041	0.818988	0.750446	0.759573	0.754505	0.759573	0.898016
			average	0.916506	0.796847	0.743141	0.756668	0.747657	0.756668	0.894503
		F2Med	1	0.941348	0.838309	0.79026	0.841202	0.798976	0.812444	0.921762
			2	0.935182	0.824387	0.776101	0.830472	0.786753	0.801603	0.916114
			3	0.936554	0.835243	0.785845	0.841202	0.793756	0.80345	0.919632
			4	0.938161	0.822764	0.796104	0.845494	0.796606	0.7988	0.918515
			5	0.939807	0.843544	0.802168	0.851931	0.813556	0.828827	0.926305
			average	0.93821	0.83285	0.790095	0.84206	0.79793	0.809025	0.920466
Fig. 3g	A7	RETFound	1	0.918931	0.70504	0.702666	0.677891	0.684351	0.677891	0.961747
			2	0.916394	0.700322	0.692736	0.670402	0.678799	0.670402	0.960589
			3	0.912233	0.704088	0.703242	0.678367	0.687255	0.678367	0.961563
			4	0.915927	0.688795	0.68278	0.658675	0.662663	0.658675	0.960453
			5	0.921369	0.702415	0.699001	0.675823	0.684796	0.675823	0.96121
			average	0.916971	0.700132	0.696085	0.672232	0.679573	0.672232	0.961112
		BiomedGPT	1	0.920341	0.692086	0.686768	0.680733	0.681768	0.680733	0.962747
			2	0.921417	0.691171	0.694054	0.681328	0.686344	0.681328	0.962505
			3	0.918539	0.700689	0.696273	0.682209	0.687897	0.682209	0.96197
			4	0.922772	0.695073	0.687665	0.673955	0.678484	0.673955	0.961556
			5	0.92221	0.697243	0.695255	0.694413	0.694599	0.694413	0.962917
			average	0.921056	0.695252	0.692003	0.682528	0.685819	0.682528	0.962339
		F2Med	1	0.948043	0.773529	0.745962	0.781799	0.738717	0.732864	0.968282
			2	0.94707	0.768488	0.746604	0.781528	0.741226	0.737524	0.9683
			3	0.952018	0.777694	0.758241	0.799082	0.745601	0.740791	0.97051
			4	0.948668	0.771979	0.765705	0.795031	0.743657	0.733197	0.969699
			5	0.949176	0.771407	0.748755	0.785309	0.744059	0.740761	0.96888
			average	0.948995	0.772619	0.753053	0.78855	0.742652	0.737027	0.969134
Fig. 3h	A8	RETFound	1	0.995789	0.975253	0.94832	0.9475	0.947456	0.9475	0.9925
			2	0.995646	0.973791	0.951443	0.9505	0.950364	0.9505	0.992929
			3	0.995469	0.97382	0.950212	0.949333	0.949298	0.949333	0.992762
			4	0.996006	0.976865	0.946509	0.945833	0.945613	0.945833	0.992262
			5	0.994688	0.968474	0.946975	0.9465	0.946489	0.9465	0.992357
			average	0.995519	0.973641	0.948692	0.947933	0.947844	0.947933	0.992562
		BiomedGPT	1	0.99726	0.983745	0.965645	0.9655	0.96551	0.9655	0.995071
			2	0.997161	0.983497	0.961544	0.9615	0.961445	0.9615	0.9945
			3	0.997049	0.981854	0.960825	0.960667	0.960652	0.960667	0.994381
			4	0.997261	0.983202	0.964925	0.964833	0.964771	0.964833	0.994976
			5	0.996725	0.980791	0.956728	0.956667	0.95668	0.956667	0.99381
			average	0.997091	0.982618	0.961933	0.961833	0.961812	0.961833	0.994548
		F2Med	1	0.997763	0.986344	0.961768	0.961833	0.961735	0.961833	0.994548
			2	0.997569	0.985366	0.964562	0.964333	0.964252	0.964333	0.994905
			3	0.997738	0.98601	0.964169	0.964	0.963868	0.964	0.994857
			4	0.997626	0.986111	0.965359	0.965167	0.965153	0.965167	0.995024
			5	0.997664	0.98597	0.961404	0.961333	0.961331	0.961333	0.994476
			average	0.997672	0.98596	0.963453	0.963333	0.963268	0.963333	0.994762
ED Fig. 3b	A4	RETFound	1	0.706274	0.32161	0.406948	0.332256	0.344107	0.332256	0.852037
			2	0.704177	0.325368	0.343475	0.363928	0.349263	0.363928	0.860489
			3	0.723772	0.336813	0.386229	0.364017	0.372272	0.364017	0.856735
			4	0.70225	0.293995	0.313584	0.293557	0.298061	0.293557	0.845638
			5	0.699996	0.320926	0.394321	0.358233	0.370533	0.358233	0.861257
			average	0.707294	0.319743	0.368912	0.342398	0.346847	0.342398	0.855231
		BiomedGPT	1	0.807259	0.426049	0.538813	0.428212	0.45726	0.428212	0.878803
			2	0.818865	0.453235	0.547442	0.43163	0.46045	0.43163	0.875487
			3	0.778995	0.447566	0.556483	0.43316	0.472313	0.43316	0.870528
			4	0.815055	0.446174	0.513702	0.458076	0.479546	0.458076	0.873185
			5	0.81028	0.443504	0.539046	0.446045	0.478374	0.446045	0.873589
			average	0.806091	0.443305	0.539097	0.439424	0.469588	0.439424	0.874318
		F2Med	1	0.867984	0.623726	0.650781	0.689567	0.618242	0.597213	0.903978
			2	0.871766	0.634186	0.670169	0.726463	0.634613	0.61199	0.901855
			3	0.86354	0.611941	0.6549	0.717557	0.592154	0.562005	0.894427
			4	0.868932	0.612161	0.606662	0.701018	0.599372	0.596609	0.898302
			5	0.861101	0.585595	0.65892	0.694656	0.589812	0.557458	0.900799
			average	0.866665	0.613522	0.648286	0.705852	0.606839	0.585055	0.899872
ED Fig. 3c	A5	RETFound	1	0.852741	0.483819	0.514493	0.510267	0.510471	0.510267	0.927121
			2	0.859321	0.496666	0.512099	0.511734	0.508716	0.511734	0.925827
			3	0.857403	0.484345	0.513269	0.51421	0.507044	0.51421	0.927397
			4	0.867811	0.50684	0.528454	0.523383	0.525019	0.523383	0.928813
			5	0.86614	0.493489	0.49694	0.507201	0.500424	0.507201	0.926544
			average	0.860683	0.493032	0.513051	0.513359	0.510335	0.513359	0.927141
		BiomedGPT	1	0.911908	0.621083	0.676592	0.620663	0.640398	0.620663	0.950527
			2	0.911955	0.616512	0.65773	0.634792	0.64405	0.634792	0.950701
			3	0.908083	0.604633	0.628052	0.618565	0.622787	0.618565	0.947478
			4	0.917386	0.619841	0.640396	0.605062	0.618103	0.605062	0.94943
			5	0.911641	0.620384	0.671362	0.610831	0.63081	0.610831	0.951305
			average	0.912194	0.616491	0.654826	0.617983	0.63123	0.617983	0.949888
		F2Med	1	0.945313	0.71392	0.689888	0.82463	0.693358	0.699635	0.956504
			2	0.941725	0.700684	0.701227	0.832424	0.699621	0.700547	0.958112
			3	0.944666	0.701408	0.698418	0.82463	0.699744	0.70598	0.956717
			4	0.944166	0.705762	0.698106	0.82463	0.694636	0.696853	0.956302
			5	0.942086	0.694919	0.68376	0.820733	0.688781	0.697713	0.95559
			average	0.943591	0.703339	0.69428	0.825409	0.695228	0.700146	0.956645
ED Fig. 3d	A6	RETFound	1	0.907577	0.779009	0.740554	0.742341	0.74143	0.742341	0.889999
			2	0.921565	0.818869	0.755779	0.776269	0.762857	0.776269	0.902482
			3	0.910597	0.790113	0.735399	0.734853	0.735123	0.734853	0.886033
			4	0.926614	0.819614	0.755348	0.762348	0.757566	0.762348	0.901759
			5	0.912331	0.793518	0.729677	0.737365	0.731764	0.737365	0.888646
			average	0.915737	0.800224	0.743351	0.750635	0.745748	0.750635	0.893784
		BiomedGPT	1	0.918502	0.796553	0.747602	0.770686	0.754847	0.770686	0.897617
			2	0.915304	0.783864	0.754398	0.778183	0.761314	0.778183	0.902019
			3	0.911477	0.78545	0.726208	0.736155	0.729757	0.736155	0.884984
			4	0.913208	0.799383	0.737051	0.738743	0.737862	0.738743	0.889881
			5	0.924041	0.818988	0.750446	0.759573	0.754505	0.759573	0.898016
			average	0.916506	0.796847	0.743141	0.756668	0.747657	0.756668	0.894503
		F2Med	1	0.933669	0.815165	0.793156	0.845494	0.796919	0.802895	0.918199
			2	0.932712	0.824399	0.779229	0.834764	0.787115	0.796767	0.916149
			3	0.929474	0.816657	0.765232	0.828326	0.772801	0.782538	0.913454
			4	0.939132	0.827595	0.805506	0.856223	0.807972	0.810841	0.924415
			5	0.935382	0.818884	0.790386	0.843348	0.799689	0.812012	0.921061
			average	0.934074	0.82054	0.786702	0.841631	0.792899	0.801011	0.918656
ED Fig. 3e	A7	RETFound	1	0.918931	0.70504	0.702666	0.677891	0.684351	0.677891	0.961747
			2	0.916394	0.700322	0.692736	0.670402	0.678799	0.670402	0.960589
			3	0.912233	0.704088	0.703242	0.678367	0.687255	0.678367	0.961563
			4	0.915927	0.688795	0.68278	0.658675	0.662663	0.658675	0.960453
			5	0.921369	0.702415	0.699001	0.675823	0.684796	0.675823	0.96121
			average	0.916971	0.700132	0.696085	0.672232	0.679573	0.672232	0.961112
		BiomedGPT	1	0.920341	0.692086	0.686768	0.680733	0.681768	0.680733	0.962747
			2	0.921417	0.691171	0.694054	0.681328	0.686344	0.681328	0.962505
			3	0.918539	0.700689	0.696273	0.682209	0.687897	0.682209	0.96197
			4	0.922772	0.695073	0.687665	0.673955	0.678484	0.673955	0.961556
			5	0.92221	0.697243	0.695255	0.694413	0.694599	0.694413	0.962917
			average	0.921056	0.695252	0.692003	0.682528	0.685819	0.682528	0.962339
		F2Med	1	0.938951	0.754486	0.735518	0.781528	0.728413	0.724784	0.968075
			2	0.938446	0.756511	0.73758	0.775857	0.732532	0.728839	0.967335
			3	0.938971	0.752268	0.730498	0.775317	0.719751	0.715355	0.966976
			4	0.940827	0.754434	0.744099	0.779908	0.733474	0.725797	0.967856
			5	0.940335	0.752155	0.726995	0.771537	0.722373	0.719189	0.966785
			average	0.939506	0.753971	0.734938	0.77683	0.727309	0.722793	0.967405
ED Fig. 3f	A8	RETFound	1	0.995789	0.975253	0.94832	0.9475	0.947456	0.9475	0.9925
			2	0.995646	0.973791	0.951443	0.9505	0.950364	0.9505	0.992929
			3	0.995469	0.97382	0.950212	0.949333	0.949298	0.949333	0.992762
			4	0.996006	0.976865	0.946509	0.945833	0.945613	0.945833	0.992262
			5	0.994688	0.968474	0.946975	0.9465	0.946489	0.9465	0.992357
			average	0.995519	0.973641	0.948692	0.947933	0.947844	0.947933	0.992562
		BiomedGPT	1	0.99726	0.983745	0.965645	0.9655	0.96551	0.9655	0.995071
			2	0.997161	0.983497	0.961544	0.9615	0.961445	0.9615	0.9945
			3	0.997049	0.981854	0.960825	0.960667	0.960652	0.960667	0.994381
			4	0.997261	0.983202	0.964925	0.964833	0.964771	0.964833	0.994976
			5	0.996725	0.980791	0.956728	0.956667	0.95668	0.956667	0.99381
			average	0.997091	0.982618	0.961933	0.961833	0.961812	0.961833	0.994548
		F2Med	1	0.997763	0.98656	0.96028	0.960333	0.960272	0.960333	0.994333
			2	0.997825	0.987521	0.966954	0.966833	0.966793	0.966833	0.995262
			3	0.997843	0.986783	0.964335	0.964167	0.96419	0.964167	0.994881
			4	0.997742	0.986309	0.962798	0.962833	0.962725	0.962833	0.99469
			5	0.997575	0.985463	0.961016	0.960667	0.960625	0.960667	0.994381
			average	0.99775	0.986527	0.963076	0.962967	0.962921	0.962967	0.99471
ED Fig. 3h	A4	RETFound	1	0.706274	0.32161	0.406948	0.332256	0.344107	0.332256	0.852037
			2	0.704177	0.325368	0.343475	0.363928	0.349263	0.363928	0.860489
			3	0.723772	0.336813	0.386229	0.364017	0.372272	0.364017	0.856735
			4	0.70225	0.293995	0.313584	0.293557	0.298061	0.293557	0.845638
			5	0.699996	0.320926	0.394321	0.358233	0.370533	0.358233	0.861257
			average	0.707294	0.319743	0.368912	0.342398	0.346847	0.342398	0.855231
		BiomedGPT	1	0.807259	0.426049	0.538813	0.428212	0.45726	0.428212	0.878803
			2	0.818865	0.453235	0.547442	0.43163	0.46045	0.43163	0.875487
			3	0.778995	0.447566	0.556483	0.43316	0.472313	0.43316	0.870528
			4	0.815055	0.446174	0.513702	0.458076	0.479546	0.458076	0.873185
			5	0.81028	0.443504	0.539046	0.446045	0.478374	0.446045	0.873589
			average	0.806091	0.443305	0.539097	0.439424	0.469588	0.439424	0.874318
		F2Med	1	0.87901	0.657618	0.647839	0.712468	0.640433	0.635213	0.905137
			2	0.873104	0.659841	0.675462	0.703562	0.646333	0.627634	0.908462
			3	0.870062	0.645503	0.650746	0.697201	0.63951	0.633569	0.902969
			4	0.870717	0.650031	0.673005	0.706107	0.656002	0.64434	0.909248
			5	0.867494	0.638151	0.693737	0.727735	0.616598	0.576229	0.8958
			average	0.872077	0.650229	0.668158	0.709415	0.639775	0.623397	0.904323
ED Fig. 3i	A5	RETFound	1	0.852741	0.483819	0.514493	0.510267	0.510471	0.510267	0.927121
			2	0.859321	0.496666	0.512099	0.511734	0.508716	0.511734	0.925827
			3	0.857403	0.484345	0.513269	0.51421	0.507044	0.51421	0.927397
			4	0.867811	0.50684	0.528454	0.523383	0.525019	0.523383	0.928813
			5	0.86614	0.493489	0.49694	0.507201	0.500424	0.507201	0.926544
			average	0.860683	0.493032	0.513051	0.513359	0.510335	0.513359	0.927141
		BiomedGPT	1	0.911908	0.621083	0.676592	0.620663	0.640398	0.620663	0.950527
			2	0.911955	0.616512	0.65773	0.634792	0.64405	0.634792	0.950701
			3	0.908083	0.604633	0.628052	0.618565	0.622787	0.618565	0.947478
			4	0.917386	0.619841	0.640396	0.605062	0.618103	0.605062	0.94943
			5	0.911641	0.620384	0.671362	0.610831	0.63081	0.610831	0.951305
			average	0.912194	0.616491	0.654826	0.617983	0.63123	0.617983	0.949888
		F2Med	1	0.939331	0.695794	0.667535	0.809041	0.674996	0.69434	0.953558
			2	0.939367	0.693587	0.678603	0.82385	0.681812	0.687111	0.956968
			3	0.942083	0.703688	0.676717	0.819174	0.678893	0.683544	0.955301
			4	0.934069	0.672316	0.679433	0.819174	0.675795	0.677978	0.954843
			5	0.938687	0.69439	0.68701	0.820733	0.686906	0.688841	0.955333
			average	0.938707	0.691955	0.67786	0.818394	0.679681	0.686363	0.955201
ED Fig. 3j	A6	RETFound	1	0.907577	0.779009	0.740554	0.742341	0.74143	0.742341	0.889999
			2	0.921565	0.818869	0.755779	0.776269	0.762857	0.776269	0.902482
			3	0.910597	0.790113	0.735399	0.734853	0.735123	0.734853	0.886033
			4	0.926614	0.819614	0.755348	0.762348	0.757566	0.762348	0.901759
			5	0.912331	0.793518	0.729677	0.737365	0.731764	0.737365	0.888646
			average	0.915737	0.800224	0.743351	0.750635	0.745748	0.750635	0.893784
		BiomedGPT	1	0.918502	0.796553	0.747602	0.770686	0.754847	0.770686	0.897617
			2	0.915304	0.783864	0.754398	0.778183	0.761314	0.778183	0.902019
			3	0.911477	0.78545	0.726208	0.736155	0.729757	0.736155	0.884984
			4	0.913208	0.799383	0.737051	0.738743	0.737862	0.738743	0.889881
			5	0.924041	0.818988	0.750446	0.759573	0.754505	0.759573	0.898016
			average	0.916506	0.796847	0.743141	0.756668	0.747657	0.756668	0.894503
		F2Med	1	0.93687	0.846688	0.785464	0.841202	0.788816	0.79307	0.915909
			2	0.936302	0.837778	0.789002	0.845494	0.794665	0.801509	0.920676
			3	0.934104	0.836811	0.797655	0.849785	0.800605	0.804096	0.920932
			4	0.937647	0.838554	0.797254	0.84764	0.806841	0.819065	0.923336
			5	0.923515	0.815373	0.755656	0.819743	0.759796	0.765722	0.905844
			average	0.933688	0.835041	0.785006	0.840773	0.790145	0.796693	0.917339
ED Fig. 3k	A7	RETFound	1	0.918931	0.70504	0.702666	0.677891	0.684351	0.677891	0.961747
			2	0.916394	0.700322	0.692736	0.670402	0.678799	0.670402	0.960589
			3	0.912233	0.704088	0.703242	0.678367	0.687255	0.678367	0.961563
			4	0.915927	0.688795	0.68278	0.658675	0.662663	0.658675	0.960453
			5	0.921369	0.702415	0.699001	0.675823	0.684796	0.675823	0.96121
			average	0.916971	0.700132	0.696085	0.672232	0.679573	0.672232	0.961112
		BiomedGPT	1	0.920341	0.692086	0.686768	0.680733	0.681768	0.680733	0.962747
			2	0.921417	0.691171	0.694054	0.681328	0.686344	0.681328	0.962505
			3	0.918539	0.700689	0.696273	0.682209	0.687897	0.682209	0.96197
			4	0.922772	0.695073	0.687665	0.673955	0.678484	0.673955	0.961556
			5	0.92221	0.697243	0.695255	0.694413	0.694599	0.694413	0.962917
			average	0.921056	0.695252	0.692003	0.682528	0.685819	0.682528	0.962339
		F2Med	1	0.947874	0.771504	0.767632	0.797462	0.744718	0.738112	0.970101
			2	0.947042	0.767577	0.74752	0.7899	0.73999	0.734704	0.969407
			3	0.951688	0.771627	0.746263	0.784499	0.740379	0.736698	0.968722
			4	0.951465	0.772224	0.742299	0.783149	0.736472	0.733031	0.968484
			5	0.945598	0.760843	0.75048	0.779908	0.742739	0.73687	0.968104
			average	0.948733	0.768755	0.750839	0.786984	0.74086	0.735883	0.968964
ED Fig. 3l	A8	RETFound	1	0.995789	0.975253	0.94832	0.9475	0.947456	0.9475	0.9925
			2	0.995646	0.973791	0.951443	0.9505	0.950364	0.9505	0.992929
			3	0.995469	0.97382	0.950212	0.949333	0.949298	0.949333	0.992762
			4	0.996006	0.976865	0.946509	0.945833	0.945613	0.945833	0.992262
			5	0.994688	0.968474	0.946975	0.9465	0.946489	0.9465	0.992357
			average	0.995519	0.973641	0.948692	0.947933	0.947844	0.947933	0.992562
		BiomedGPT	1	0.99726	0.983745	0.965645	0.9655	0.96551	0.9655	0.995071
			2	0.997161	0.983497	0.961544	0.9615	0.961445	0.9615	0.9945
			3	0.997049	0.981854	0.960825	0.960667	0.960652	0.960667	0.994381
			4	0.997261	0.983202	0.964925	0.964833	0.964771	0.964833	0.994976
			5	0.996725	0.980791	0.956728	0.956667	0.95668	0.956667	0.99381
			average	0.997091	0.982618	0.961933	0.961833	0.961812	0.961833	0.994548
		F2Med	1	0.997308	0.98471	0.960654	0.960667	0.960585	0.960667	0.994381
			2	0.99763	0.986006	0.963384	0.963333	0.963241	0.963333	0.994762
			3	0.997419	0.98493	0.962256	0.962333	0.962271	0.962333	0.994619
			4	0.997624	0.985481	0.963192	0.963167	0.963097	0.963167	0.994738
			5	0.997528	0.985102	0.963297	0.963167	0.963161	0.963167	0.994738
			average	0.997502	0.985246	0.962557	0.962533	0.962471	0.962533	0.994648
ED Fig. 3n	A4	RETFound	1	0.706274	0.32161	0.406948	0.332256	0.344107	0.332256	0.852037
			2	0.704177	0.325368	0.343475	0.363928	0.349263	0.363928	0.860489
			3	0.723772	0.336813	0.386229	0.364017	0.372272	0.364017	0.856735
			4	0.70225	0.293995	0.313584	0.293557	0.298061	0.293557	0.845638
			5	0.699996	0.320926	0.394321	0.358233	0.370533	0.358233	0.861257
			average	0.707294	0.319743	0.368912	0.342398	0.346847	0.342398	0.855231
		BiomedGPT	1	0.807259	0.426049	0.538813	0.428212	0.45726	0.428212	0.878803
			2	0.818865	0.453235	0.547442	0.43163	0.46045	0.43163	0.875487
			3	0.778995	0.447566	0.556483	0.43316	0.472313	0.43316	0.870528
			4	0.815055	0.446174	0.513702	0.458076	0.479546	0.458076	0.873185
			5	0.81028	0.443504	0.539046	0.446045	0.478374	0.446045	0.873589
			average	0.806091	0.443305	0.539097	0.439424	0.469588	0.439424	0.874318
		F2Med	1	0.869122	0.625019	0.638644	0.689567	0.618066	0.601699	0.901489
			2	0.865217	0.597721	0.628743	0.688295	0.590818	0.563708	0.900227
			3	0.869207	0.601816	0.613674	0.699746	0.58109	0.557349	0.896492
			4	0.866726	0.596095	0.623072	0.692112	0.594784	0.579113	0.903958
			5	0.864551	0.607698	0.603942	0.684478	0.594156	0.587176	0.897501
			average	0.866964	0.60567	0.621615	0.69084	0.595783	0.577809	0.899933
ED Fig. 3o	A5	RETFound	1	0.852741	0.483819	0.514493	0.510267	0.510471	0.510267	0.927121
			2	0.859321	0.496666	0.512099	0.511734	0.508716	0.511734	0.925827
			3	0.857403	0.484345	0.513269	0.51421	0.507044	0.51421	0.927397
			4	0.867811	0.50684	0.528454	0.523383	0.525019	0.523383	0.928813
			5	0.86614	0.493489	0.49694	0.507201	0.500424	0.507201	0.926544
			average	0.860683	0.493032	0.513051	0.513359	0.510335	0.513359	0.927141
		BiomedGPT	1	0.911908	0.621083	0.676592	0.620663	0.640398	0.620663	0.950527
			2	0.911955	0.616512	0.65773	0.634792	0.64405	0.634792	0.950701
			3	0.908083	0.604633	0.628052	0.618565	0.622787	0.618565	0.947478
			4	0.917386	0.619841	0.640396	0.605062	0.618103	0.605062	0.94943
			5	0.911641	0.620384	0.671362	0.610831	0.63081	0.610831	0.951305
			average	0.912194	0.616491	0.654826	0.617983	0.63123	0.617983	0.949888
		F2Med	1	0.94078	0.691491	0.661092	0.805144	0.672252	0.696644	0.953443
			2	0.937961	0.67046	0.668966	0.815277	0.676043	0.684339	0.954437
			3	0.938274	0.675331	0.668145	0.809041	0.675183	0.691797	0.953425
			4	0.939893	0.692644	0.671236	0.812159	0.675709	0.682117	0.953182
			5	0.939526	0.670817	0.676439	0.816836	0.684164	0.693897	0.954901
			average	0.939287	0.680149	0.669175	0.811691	0.67667	0.689759	0.953878
ED Fig. 3p	A6	RETFound	1	0.907577	0.779009	0.740554	0.742341	0.74143	0.742341	0.889999
			2	0.921565	0.818869	0.755779	0.776269	0.762857	0.776269	0.902482
			3	0.910597	0.790113	0.735399	0.734853	0.735123	0.734853	0.886033
			4	0.926614	0.819614	0.755348	0.762348	0.757566	0.762348	0.901759
			5	0.912331	0.793518	0.729677	0.737365	0.731764	0.737365	0.888646
			average	0.915737	0.800224	0.743351	0.750635	0.745748	0.750635	0.893784
		BiomedGPT	1	0.918502	0.796553	0.747602	0.770686	0.754847	0.770686	0.897617
			2	0.915304	0.783864	0.754398	0.778183	0.761314	0.778183	0.902019
			3	0.911477	0.78545	0.726208	0.736155	0.729757	0.736155	0.884984
			4	0.913208	0.799383	0.737051	0.738743	0.737862	0.738743	0.889881
			5	0.924041	0.818988	0.750446	0.759573	0.754505	0.759573	0.898016
			average	0.916506	0.796847	0.743141	0.756668	0.747657	0.756668	0.894503
		F2Med	1	0.940099	0.830449	0.782087	0.839056	0.793516	0.809425	0.921137
			2	0.929366	0.828614	0.760245	0.815451	0.766474	0.781186	0.911994
			3	0.914425	0.777969	0.751438	0.813305	0.761356	0.77678	0.910154
			4	0.938417	0.833001	0.79364	0.84764	0.799608	0.8073	0.922989
			5	0.933428	0.827032	0.787237	0.841202	0.797963	0.812259	0.92132
			average	0.931147	0.819413	0.774929	0.83133	0.783783	0.79739	0.917519
ED Fig. 3q	A7	RETFound	1	0.918931	0.70504	0.702666	0.677891	0.684351	0.677891	0.961747
			2	0.916394	0.700322	0.692736	0.670402	0.678799	0.670402	0.960589
			3	0.912233	0.704088	0.703242	0.678367	0.687255	0.678367	0.961563
			4	0.915927	0.688795	0.68278	0.658675	0.662663	0.658675	0.960453
			5	0.921369	0.702415	0.699001	0.675823	0.684796	0.675823	0.96121
			average	0.916971	0.700132	0.696085	0.672232	0.679573	0.672232	0.961112
		BiomedGPT	1	0.920341	0.692086	0.686768	0.680733	0.681768	0.680733	0.962747
			2	0.921417	0.691171	0.694054	0.681328	0.686344	0.681328	0.962505
			3	0.918539	0.700689	0.696273	0.682209	0.687897	0.682209	0.96197
			4	0.922772	0.695073	0.687665	0.673955	0.678484	0.673955	0.961556
			5	0.92221	0.697243	0.695255	0.694413	0.694599	0.694413	0.962917
			average	0.921056	0.695252	0.692003	0.682528	0.685819	0.682528	0.962339
		F2Med	1	0.944504	0.758452	0.740154	0.777208	0.733966	0.729148	0.967644
			2	0.945324	0.761749	0.742155	0.778558	0.732915	0.726066	0.967846
			3	0.941147	0.760869	0.750642	0.78774	0.7403	0.734968	0.96889
			4	0.946113	0.764569	0.756087	0.786659	0.740462	0.730783	0.968652
			5	0.942167	0.749817	0.736195	0.770456	0.72592	0.719041	0.96677
			average	0.943851	0.759091	0.745047	0.780124	0.734713	0.728001	0.96796
ED Fig. 3r	A8	RETFound	1	0.995789	0.975253	0.94832	0.9475	0.947456	0.9475	0.9925
			2	0.995646	0.973791	0.951443	0.9505	0.950364	0.9505	0.992929
			3	0.995469	0.97382	0.950212	0.949333	0.949298	0.949333	0.992762
			4	0.996006	0.976865	0.946509	0.945833	0.945613	0.945833	0.992262
			5	0.994688	0.968474	0.946975	0.9465	0.946489	0.9465	0.992357
			average	0.995519	0.973641	0.948692	0.947933	0.947844	0.947933	0.992562
		BiomedGPT	1	0.99726	0.983745	0.965645	0.9655	0.96551	0.9655	0.995071
			2	0.997161	0.983497	0.961544	0.9615	0.961445	0.9615	0.9945
			3	0.997049	0.981854	0.960825	0.960667	0.960652	0.960667	0.994381
			4	0.997261	0.983202	0.964925	0.964833	0.964771	0.964833	0.994976
			5	0.996725	0.980791	0.956728	0.956667	0.95668	0.956667	0.99381
			average	0.997091	0.982618	0.961933	0.961833	0.961812	0.961833	0.994548
		F2Med	1	0.997581	0.98535	0.965832	0.965833	0.965742	0.965833	0.995119
			2	0.99753	0.985166	0.962578	0.9625	0.962403	0.9625	0.994643
			3	0.997634	0.986089	0.962312	0.962333	0.962294	0.962333	0.994619
			4	0.997554	0.985844	0.963628	0.963667	0.963581	0.963667	0.99481
			5	0.99767	0.985899	0.960878	0.960833	0.960813	0.960833	0.994405
			average	0.997594	0.98567	0.963046	0.963033	0.962966	0.963033	0.994719
Fig. 4d	B1	CONCH	1	0.835111	0.651967	0.620637	0.631548	0.585762	0.631548	0.884838
			2	0.807484	0.606547	0.585595	0.619615	0.586493	0.619615	0.883035
			3	0.793167	0.564566	0.596159	0.592001	0.592899	0.592001	0.874391
			4	0.794328	0.590412	0.584986	0.619147	0.580125	0.619147	0.88165
			5	0.866154	0.703477	0.671392	0.66919	0.657784	0.66919	0.897937
			average	0.819249	0.623394	0.611754	0.6263	0.600613	0.6263	0.88437
		BiomedGPT	1	0.841223	0.624958	0.613865	0.616289	0.606934	0.616289	0.88027
			2	0.834823	0.608111	0.587894	0.594959	0.588274	0.594959	0.873713
			3	0.838136	0.613097	0.6194	0.608963	0.610375	0.608963	0.876812
			4	0.823941	0.58326	0.56146	0.578999	0.564823	0.578999	0.868873
			5	0.830453	0.593681	0.598654	0.600875	0.585264	0.600875	0.87468
			average	0.833715	0.604621	0.596255	0.600017	0.591134	0.600017	0.87487
		F2Med	1	0.905942	0.671973	0.661284	0.7719	0.648475	0.660936	0.929123
			2	0.909387	0.683701	0.68521	0.763648	0.649995	0.667023	0.92804
			3	0.907037	0.67301	0.666785	0.733428	0.624916	0.641794	0.917989
			4	0.878004	0.650255	0.667336	0.72616	0.620239	0.642588	0.918273
			5	0.90616	0.672944	0.693206	0.794415	0.655636	0.663614	0.935154
			average	0.901306	0.670377	0.674764	0.75791	0.639852	0.655191	0.925716
Fig. 4e	B2	CONCH	1	0.945926	0.664407	0.641923	0.581977	0.602084	0.581977	0.965225
			2	0.936454	0.647815	0.660725	0.591437	0.605995	0.591437	0.965202
			3	0.931699	0.633269	0.612807	0.559359	0.578599	0.559359	0.96312
			4	0.924508	0.642545	0.662282	0.569039	0.600804	0.569039	0.962282
			5	0.929096	0.635184	0.631998	0.568367	0.590369	0.568367	0.963377
			average	0.933537	0.644644	0.641947	0.574036	0.59557	0.574036	0.963841
		BiomedGPT	1	0.924158	0.682053	0.662511	0.632644	0.643816	0.632644	0.969572
			2	0.953796	0.703428	0.640396	0.616214	0.623697	0.616214	0.968143
			3	0.94658	0.692214	0.69035	0.638931	0.652703	0.638931	0.970059
			4	0.9416	0.71196	0.655167	0.638	0.64224	0.638	0.969927
			5	0.95688	0.713598	0.728921	0.64658	0.669735	0.64658	0.971439
			average	0.944603	0.700651	0.675469	0.634474	0.646438	0.634474	0.969828
		F2Med	1	0.951985	0.752076	0.698924	0.770314	0.654583	0.635042	0.968402
			2	0.880701	0.63223	0.624143	0.757729	0.613736	0.613663	0.967688
			3	0.936656	0.678976	0.646914	0.752006	0.622246	0.607646	0.966052
			4	0.929361	0.652577	0.632554	0.751215	0.614381	0.602894	0.966131
			5	0.930754	0.677168	0.649047	0.766386	0.619462	0.610976	0.96863
			average	0.925891	0.678605	0.650316	0.75953	0.624881	0.614045	0.967381
ED Fig. 6b	B1	CONCH	1	0.835111	0.651967	0.620637	0.631548	0.585762	0.631548	0.884838
			2	0.807484	0.606547	0.585595	0.619615	0.586493	0.619615	0.883035
			3	0.793167	0.564566	0.596159	0.592001	0.592899	0.592001	0.874391
			4	0.794328	0.590412	0.584986	0.619147	0.580125	0.619147	0.88165
			5	0.866154	0.703477	0.671392	0.66919	0.657784	0.66919	0.897937
			average	0.819249	0.623394	0.611754	0.6263	0.600613	0.6263	0.88437
		BiomedGPT	1	0.841223	0.624958	0.613865	0.616289	0.606934	0.616289	0.88027
			2	0.834823	0.608111	0.587894	0.594959	0.588274	0.594959	0.873713
			3	0.838136	0.613097	0.6194	0.608963	0.610375	0.608963	0.876812
			4	0.823941	0.58326	0.56146	0.578999	0.564823	0.578999	0.868873
			5	0.830453	0.593681	0.598654	0.600875	0.585264	0.600875	0.87468
			average	0.833715	0.604621	0.596255	0.600017	0.591134	0.600017	0.87487
		F2Med	1	0.90074	0.671795	0.657218	0.741571	0.631909	0.651306	0.920955
			2	0.898299	0.671385	0.661808	0.743155	0.631847	0.651721	0.921552
			3	0.90641	0.678154	0.690382	0.73157	0.628776	0.667488	0.920576
			4	0.883808	0.660281	0.6816	0.780972	0.636612	0.628477	0.929437
			5	0.916574	0.690262	0.715642	0.783649	0.65754	0.674922	0.931359
			average	0.901166	0.674376	0.68133	0.756183	0.637337	0.654783	0.924776
ED Fig. 6c	B2	CONCH	1	0.945926	0.664407	0.641923	0.581977	0.602084	0.581977	0.965225
			2	0.936454	0.647815	0.660725	0.591437	0.605995	0.591437	0.965202
			3	0.931699	0.633269	0.612807	0.559359	0.578599	0.559359	0.96312
			4	0.924508	0.642545	0.662282	0.569039	0.600804	0.569039	0.962282
			5	0.929096	0.635184	0.631998	0.568367	0.590369	0.568367	0.963377
			average	0.933537	0.644644	0.641947	0.574036	0.59557	0.574036	0.963841
		BiomedGPT	1	0.924158	0.682053	0.662511	0.632644	0.643816	0.632644	0.969572
			2	0.953796	0.703428	0.640396	0.616214	0.623697	0.616214	0.968143
			3	0.94658	0.692214	0.69035	0.638931	0.652703	0.638931	0.970059
			4	0.9416	0.71196	0.655167	0.638	0.64224	0.638	0.969927
			5	0.95688	0.713598	0.728921	0.64658	0.669735	0.64658	0.971439
			average	0.944603	0.700651	0.675469	0.634474	0.646438	0.634474	0.969828
		F2Med	1	0.913261	0.672333	0.66647	0.760902	0.634933	0.625194	0.967219
			2	0.858938	0.645212	0.642898	0.766123	0.623708	0.613499	0.967847
			3	0.924553	0.672805	0.670503	0.782695	0.638826	0.627995	0.970617
			4	0.937679	0.679986	0.62464	0.764878	0.616486	0.613233	0.968151
			5	0.922138	0.672119	0.631434	0.760843	0.604522	0.59872	0.967926
			average	0.911314	0.668491	0.647189	0.767088	0.623695	0.615728	0.968352
ED Fig. 6e	B1	CONCH	1	0.835111	0.651967	0.620637	0.631548	0.585762	0.631548	0.884838
			2	0.807484	0.606547	0.585595	0.619615	0.586493	0.619615	0.883035
			3	0.793167	0.564566	0.596159	0.592001	0.592899	0.592001	0.874391
			4	0.794328	0.590412	0.584986	0.619147	0.580125	0.619147	0.88165
			5	0.866154	0.703477	0.671392	0.66919	0.657784	0.66919	0.897937
			average	0.819249	0.623394	0.611754	0.6263	0.600613	0.6263	0.88437
		BiomedGPT	1	0.841223	0.624958	0.613865	0.616289	0.606934	0.616289	0.88027
			2	0.834823	0.608111	0.587894	0.594959	0.588274	0.594959	0.873713
			3	0.838136	0.613097	0.6194	0.608963	0.610375	0.608963	0.876812
			4	0.823941	0.58326	0.56146	0.578999	0.564823	0.578999	0.868873
			5	0.830453	0.593681	0.598654	0.600875	0.585264	0.600875	0.87468
			average	0.833715	0.604621	0.596255	0.600017	0.591134	0.600017	0.87487
		F2Med	1	0.883438	0.648772	0.653878	0.789169	0.62198	0.610176	0.929642
			2	0.874759	0.634014	0.632263	0.761353	0.61506	0.622685	0.92485
			3	0.900241	0.678286	0.69155	0.774195	0.654046	0.670093	0.931916
			4	0.878913	0.647415	0.654841	0.721187	0.607443	0.626542	0.91647
			5	0.897985	0.663693	0.675425	0.740806	0.618523	0.636063	0.920683
			average	0.887067	0.654436	0.661591	0.757342	0.62341	0.633112	0.924712
ED Fig. 6f	B2	CONCH	1	0.945926	0.664407	0.641923	0.581977	0.602084	0.581977	0.965225
			2	0.936454	0.647815	0.660725	0.591437	0.605995	0.591437	0.965202
			3	0.931699	0.633269	0.612807	0.559359	0.578599	0.559359	0.96312
			4	0.924508	0.642545	0.662282	0.569039	0.600804	0.569039	0.962282
			5	0.929096	0.635184	0.631998	0.568367	0.590369	0.568367	0.963377
			average	0.933537	0.644644	0.641947	0.574036	0.59557	0.574036	0.963841
		BiomedGPT	1	0.924158	0.682053	0.662511	0.632644	0.643816	0.632644	0.969572
			2	0.953796	0.703428	0.640396	0.616214	0.623697	0.616214	0.968143
			3	0.94658	0.692214	0.69035	0.638931	0.652703	0.638931	0.970059
			4	0.9416	0.71196	0.655167	0.638	0.64224	0.638	0.969927
			5	0.95688	0.713598	0.728921	0.64658	0.669735	0.64658	0.971439
			average	0.944603	0.700651	0.675469	0.634474	0.646438	0.634474	0.969828
		F2Med	1	0.921855	0.730526	0.718536	0.774301	0.66742	0.64563	0.968883
			2	0.845536	0.660412	0.65219	0.762423	0.623601	0.611539	0.96723
			3	0.930514	0.690471	0.686192	0.763261	0.650014	0.631177	0.967009
			4	0.95197	0.726577	0.659559	0.768542	0.647854	0.670137	0.968366
			5	0.906562	0.676145	0.653876	0.76914	0.62963	0.617203	0.968751
			average	0.911287	0.696826	0.67407	0.767534	0.643704	0.635137	0.968048
ED Fig. 6h	B1	CONCH	1	0.835111	0.651967	0.620637	0.631548	0.585762	0.631548	0.884838
			2	0.807484	0.606547	0.585595	0.619615	0.586493	0.619615	0.883035
			3	0.793167	0.564566	0.596159	0.592001	0.592899	0.592001	0.874391
			4	0.794328	0.590412	0.584986	0.619147	0.580125	0.619147	0.88165
			5	0.866154	0.703477	0.671392	0.66919	0.657784	0.66919	0.897937
			average	0.819249	0.623394	0.611754	0.6263	0.600613	0.6263	0.88437
		BiomedGPT	1	0.841223	0.624958	0.613865	0.616289	0.606934	0.616289	0.88027
			2	0.834823	0.608111	0.587894	0.594959	0.588274	0.594959	0.873713
			3	0.838136	0.613097	0.6194	0.608963	0.610375	0.608963	0.876812
			4	0.823941	0.58326	0.56146	0.578999	0.564823	0.578999	0.868873
			5	0.830453	0.593681	0.598654	0.600875	0.585264	0.600875	0.87468
			average	0.833715	0.604621	0.596255	0.600017	0.591134	0.600017	0.87487
		F2Med	1	0.89502	0.672256	0.699544	0.764741	0.64675	0.665868	0.928444
			2	0.903598	0.671977	0.685698	0.745396	0.621914	0.640555	0.921174
			3	0.887172	0.658217	0.684546	0.721569	0.617332	0.647987	0.91704
			4	0.899754	0.66591	0.656479	0.680748	0.593811	0.643726	0.906319
			5	0.865835	0.636961	0.651801	0.739658	0.617671	0.6277	0.921258
			average	0.890276	0.661064	0.675614	0.730422	0.619496	0.645167	0.918847
ED Fig. 6i	B2	CONCH	1	0.945926	0.664407	0.641923	0.581977	0.602084	0.581977	0.965225
			2	0.936454	0.647815	0.660725	0.591437	0.605995	0.591437	0.965202
			3	0.931699	0.633269	0.612807	0.559359	0.578599	0.559359	0.96312
			4	0.924508	0.642545	0.662282	0.569039	0.600804	0.569039	0.962282
			5	0.929096	0.635184	0.631998	0.568367	0.590369	0.568367	0.963377
			average	0.933537	0.644644	0.641947	0.574036	0.59557	0.574036	0.963841
		BiomedGPT	1	0.924158	0.682053	0.662511	0.632644	0.643816	0.632644	0.969572
			2	0.953796	0.703428	0.640396	0.616214	0.623697	0.616214	0.968143
			3	0.94658	0.692214	0.69035	0.638931	0.652703	0.638931	0.970059
			4	0.9416	0.71196	0.655167	0.638	0.64224	0.638	0.969927
			5	0.95688	0.713598	0.728921	0.64658	0.669735	0.64658	0.971439
			average	0.944603	0.700651	0.675469	0.634474	0.646438	0.634474	0.969828
		F2Med	1	0.913406	0.703883	0.660121	0.755406	0.639074	0.632062	0.966373
			2	0.923993	0.690297	0.656211	0.74342	0.645056	0.647534	0.964648
			3	0.919023	0.670423	0.687983	0.767189	0.641135	0.618919	0.967607
			4	0.942109	0.661652	0.61895	0.756161	0.612364	0.612468	0.966785
			5	0.921665	0.677265	0.690215	0.766255	0.643634	0.632224	0.968185
			average	0.924039	0.680704	0.662696	0.757686	0.636253	0.628641	0.96672
Fig. 5d	C1	MUSK	1	0.999643	0.999525	0.998002	0.998	0.998	0.998	0.999
			2	0.998733	0.999047	0.997563	0.997556	0.997556	0.997556	0.998778
			3	0.999769	0.999815	0.998889	0.998889	0.998889	0.998889	0.999444
			4	0.999989	0.999979	0.997333	0.997333	0.997333	0.997333	0.998667
			5	0.999806	0.999708	0.99667	0.996667	0.996667	0.996667	0.998333
			average	0.999588	0.999615	0.997692	0.997689	0.997689	0.997689	0.998844
		BiomedGPT	1	0.999986	0.999971	0.997339	0.997333	0.997333	0.997333	0.998667
			2	0.999966	0.999932	0.998668	0.998667	0.998666	0.998667	0.999333
			3	0.999979	0.999958	0.997563	0.997556	0.997556	0.997556	0.998778
			4	0.999772	0.999493	0.997557	0.997556	0.997556	0.997556	0.998778
			5	0.999939	0.999879	0.998232	0.998222	0.998222	0.998222	0.999111
			average	0.999928	0.999847	0.997872	0.997867	0.997867	0.997867	0.998933
		F2Med	1	0.999218	0.998463	0.991115	0.991111	0.991111	0.991111	0.995556
			2	0.999433	0.998904	0.988677	0.988667	0.988667	0.988667	0.994333
			3	0.999331	0.99871	0.991358	0.991333	0.991335	0.991333	0.995667
			4	0.999649	0.999304	0.993119	0.993111	0.993113	0.993111	0.996556
			5	0.999652	0.999319	0.98981	0.989778	0.989779	0.989778	0.994889
			average	0.999457	0.99894	0.990816	0.9908	0.990801	0.9908	0.9954
Fig. 5e	C2	MUSK	1	0.772985	0.667987	0.678747	0.645235	0.648455	0.645235	0.794666
			2	0.763048	0.634594	0.63012	0.536167	0.551275	0.536167	0.74992
			3	0.751347	0.615538	0.607282	0.517158	0.530704	0.517158	0.73322
			4	0.761853	0.606315	0.677639	0.462856	0.482154	0.462856	0.739552
			5	0.770183	0.642646	0.708748	0.50609	0.537619	0.50609	0.75191
			average	0.763883	0.633416	0.660507	0.533501	0.550041	0.533501	0.753854
		BiomedGPT	1	0.842772	0.718899	0.698917	0.673715	0.673181	0.673715	0.817164
			2	0.866317	0.753437	0.703464	0.722679	0.708982	0.722679	0.836621
			3	0.829813	0.685997	0.681013	0.665818	0.65608	0.665818	0.803202
			4	0.819462	0.703964	0.676071	0.699599	0.66225	0.699599	0.809408
			5	0.767244	0.593996	0.563296	0.557772	0.557291	0.557772	0.769146
			average	0.825121	0.691259	0.664552	0.663917	0.651557	0.663917	0.807108
		F2Med	1	0.811665	0.663961	0.670844	0.718273	0.681596	0.738922	0.832667
			2	0.806004	0.662214	0.66787	0.715049	0.675053	0.729621	0.828324
			3	0.822382	0.678577	0.690265	0.734536	0.696719	0.739637	0.836633
			4	0.798432	0.654804	0.663665	0.712116	0.674048	0.730045	0.828127
			5	0.804022	0.650507	0.671366	0.717489	0.67536	0.732055	0.829421
			average	0.808501	0.662013	0.672802	0.719492	0.680555	0.734056	0.831034
ED Fig. 8b	C1	MUSK	1	0.999643	0.999525	0.998002	0.998	0.998	0.998	0.999
			2	0.998733	0.999047	0.997563	0.997556	0.997556	0.997556	0.998778
			3	0.999769	0.999815	0.998889	0.998889	0.998889	0.998889	0.999444
			4	0.999989	0.999979	0.997333	0.997333	0.997333	0.997333	0.998667
			5	0.999806	0.999708	0.99667	0.996667	0.996667	0.996667	0.998333
			average	0.999588	0.999615	0.997692	0.997689	0.997689	0.997689	0.998844
		BiomedGPT	1	0.999986	0.999971	0.997339	0.997333	0.997333	0.997333	0.998667
			2	0.999966	0.999932	0.998668	0.998667	0.998666	0.998667	0.999333
			3	0.999979	0.999958	0.997563	0.997556	0.997556	0.997556	0.998778
			4	0.999772	0.999493	0.997557	0.997556	0.997556	0.997556	0.998778
			5	0.999939	0.999879	0.998232	0.998222	0.998222	0.998222	0.999111
			average	0.999928	0.999847	0.997872	0.997867	0.997867	0.997867	0.998933
		F2Med	1	0.999376	0.998792	0.989565	0.989556	0.989557	0.989556	0.994778
			2	0.999208	0.998439	0.989592	0.989556	0.989553	0.989556	0.994778
			3	0.999513	0.998983	0.987803	0.987778	0.987774	0.987778	0.993889
			4	0.999469	0.998876	0.991344	0.991333	0.991335	0.991333	0.995667
			5	0.999414	0.998847	0.987573	0.987556	0.987556	0.987556	0.993778
			average	0.999396	0.998788	0.989175	0.989156	0.989155	0.989156	0.994578
ED Fig. 8c	C2	MUSK	1	0.772985	0.667987	0.678747	0.645235	0.648455	0.645235	0.794666
			2	0.763048	0.634594	0.63012	0.536167	0.551275	0.536167	0.74992
			3	0.751347	0.615538	0.607282	0.517158	0.530704	0.517158	0.73322
			4	0.761853	0.606315	0.677639	0.462856	0.482154	0.462856	0.739552
			5	0.770183	0.642646	0.708748	0.50609	0.537619	0.50609	0.75191
			average	0.763883	0.633416	0.660507	0.533501	0.550041	0.533501	0.753854
		BiomedGPT	1	0.842772	0.718899	0.698917	0.673715	0.673181	0.673715	0.817164
			2	0.866317	0.753437	0.703464	0.722679	0.708982	0.722679	0.836621
			3	0.829813	0.685997	0.681013	0.665818	0.65608	0.665818	0.803202
			4	0.819462	0.703964	0.676071	0.699599	0.66225	0.699599	0.809408
			5	0.767244	0.593996	0.563296	0.557772	0.557291	0.557772	0.769146
			average	0.825121	0.691259	0.664552	0.663917	0.651557	0.663917	0.807108
		F2Med	1	0.79347	0.651643	0.666094	0.714294	0.678653	0.737294	0.830779
			2	0.802233	0.67039	0.66685	0.713655	0.675565	0.729778	0.826659
			3	0.820091	0.682281	0.65442	0.703287	0.670519	0.730437	0.823975
			4	0.790705	0.649889	0.660702	0.709938	0.673236	0.730538	0.827601
			5	0.802064	0.652981	0.66626	0.714875	0.679753	0.739315	0.832289
			average	0.801713	0.661437	0.662865	0.71121	0.675545	0.733472	0.828261
ED Fig. 8e	C1	MUSK	1	0.999643	0.999525	0.998002	0.998	0.998	0.998	0.999
			2	0.998733	0.999047	0.997563	0.997556	0.997556	0.997556	0.998778
			3	0.999769	0.999815	0.998889	0.998889	0.998889	0.998889	0.999444
			4	0.999989	0.999979	0.997333	0.997333	0.997333	0.997333	0.998667
			5	0.999806	0.999708	0.99667	0.996667	0.996667	0.996667	0.998333
			average	0.999588	0.999615	0.997692	0.997689	0.997689	0.997689	0.998844
		BiomedGPT	1	0.999986	0.999971	0.997339	0.997333	0.997333	0.997333	0.998667
			2	0.999966	0.999932	0.998668	0.998667	0.998666	0.998667	0.999333
			3	0.999979	0.999958	0.997563	0.997556	0.997556	0.997556	0.998778
			4	0.999772	0.999493	0.997557	0.997556	0.997556	0.997556	0.998778
			5	0.999939	0.999879	0.998232	0.998222	0.998222	0.998222	0.999111
			average	0.999928	0.999847	0.997872	0.997867	0.997867	0.997867	0.998933
		F2Med	1	0.999894	0.99979	0.992724	0.992667	0.992673	0.992667	0.996333
			2	0.99953	0.999123	0.988461	0.988444	0.988436	0.988444	0.994222
			3	0.999747	0.999502	0.991795	0.991778	0.99178	0.991778	0.995889
			4	0.999718	0.999441	0.992217	0.992222	0.992219	0.992222	0.996111
			5	0.999808	0.999624	0.991795	0.991778	0.991777	0.991778	0.995889
			average	0.999739	0.999496	0.991398	0.991378	0.991377	0.991378	0.995689
ED Fig. 8f	C2	MUSK	1	0.772985	0.667987	0.678747	0.645235	0.648455	0.645235	0.794666
			2	0.763048	0.634594	0.63012	0.536167	0.551275	0.536167	0.74992
			3	0.751347	0.615538	0.607282	0.517158	0.530704	0.517158	0.73322
			4	0.761853	0.606315	0.677639	0.462856	0.482154	0.462856	0.739552
			5	0.770183	0.642646	0.708748	0.50609	0.537619	0.50609	0.75191
			average	0.763883	0.633416	0.660507	0.533501	0.550041	0.533501	0.753854
		BiomedGPT	1	0.842772	0.718899	0.698917	0.673715	0.673181	0.673715	0.817164
			2	0.866317	0.753437	0.703464	0.722679	0.708982	0.722679	0.836621
			3	0.829813	0.685997	0.681013	0.665818	0.65608	0.665818	0.803202
			4	0.819462	0.703964	0.676071	0.699599	0.66225	0.699599	0.809408
			5	0.767244	0.593996	0.563296	0.557772	0.557291	0.557772	0.769146
			average	0.825121	0.691259	0.664552	0.663917	0.651557	0.663917	0.807108
		F2Med	1	0.806349	0.674239	0.664269	0.713336	0.678072	0.737336	0.831129
			2	0.787027	0.659043	0.663137	0.710548	0.667988	0.721589	0.823358
			3	0.767713	0.628703	0.695506	0.735871	0.690845	0.728497	0.832144
			4	0.783562	0.649876	0.661374	0.710577	0.673385	0.730181	0.827522
			5	0.799273	0.669274	0.661087	0.708718	0.674719	0.711584	0.820594
			average	0.788785	0.656227	0.669075	0.71581	0.677002	0.725837	0.826949
ED Fig. 8h	C1	MUSK	1	0.999643	0.999525	0.998002	0.998	0.998	0.998	0.999
			2	0.998733	0.999047	0.997563	0.997556	0.997556	0.997556	0.998778
			3	0.999769	0.999815	0.998889	0.998889	0.998889	0.998889	0.999444
			4	0.999989	0.999979	0.997333	0.997333	0.997333	0.997333	0.998667
			5	0.999806	0.999708	0.99667	0.996667	0.996667	0.996667	0.998333
			average	0.999588	0.999615	0.997692	0.997689	0.997689	0.997689	0.998844
		BiomedGPT	1	0.999986	0.999971	0.997339	0.997333	0.997333	0.997333	0.998667
			2	0.999966	0.999932	0.998668	0.998667	0.998666	0.998667	0.999333
			3	0.999979	0.999958	0.997563	0.997556	0.997556	0.997556	0.998778
			4	0.999772	0.999493	0.997557	0.997556	0.997556	0.997556	0.998778
			5	0.999939	0.999879	0.998232	0.998222	0.998222	0.998222	0.999111
			average	0.999928	0.999847	0.997872	0.997867	0.997867	0.997867	0.998933
		F2Med	1	0.999586	0.99916	0.988674	0.988667	0.988669	0.988667	0.994333
			2	0.999267	0.998552	0.986497	0.986444	0.986458	0.986444	0.993222
			3	0.999433	0.998881	0.988457	0.988444	0.988445	0.988444	0.994222
			4	0.999518	0.999044	0.989563	0.989556	0.989559	0.989556	0.994778
			5	0.999394	0.998769	0.990026	0.99	0.99	0.99	0.995
			average	0.99944	0.998881	0.988643	0.988622	0.988626	0.988622	0.994311
ED Fig. 8i	C2	MUSK	1	0.772985	0.667987	0.678747	0.645235	0.648455	0.645235	0.794666
			2	0.763048	0.634594	0.63012	0.536167	0.551275	0.536167	0.74992
			3	0.751347	0.615538	0.607282	0.517158	0.530704	0.517158	0.73322
			4	0.761853	0.606315	0.677639	0.462856	0.482154	0.462856	0.739552
			5	0.770183	0.642646	0.708748	0.50609	0.537619	0.50609	0.75191
			average	0.763883	0.633416	0.660507	0.533501	0.550041	0.533501	0.753854
		BiomedGPT	1	0.842772	0.718899	0.698917	0.673715	0.673181	0.673715	0.817164
			2	0.866317	0.753437	0.703464	0.722679	0.708982	0.722679	0.836621
			3	0.829813	0.685997	0.681013	0.665818	0.65608	0.665818	0.803202
			4	0.819462	0.703964	0.676071	0.699599	0.66225	0.699599	0.809408
			5	0.767244	0.593996	0.563296	0.557772	0.557291	0.557772	0.769146
			average	0.825121	0.691259	0.664552	0.663917	0.651557	0.663917	0.807108
		F2Med	1	0.804975	0.673207	0.666993	0.714788	0.676465	0.734813	0.829758
			2	0.798205	0.666831	0.6642	0.712348	0.672941	0.727503	0.827261
			3	0.769432	0.63874	0.650496	0.70047	0.658905	0.714312	0.816346
			4	0.784421	0.652609	0.660884	0.709677	0.670013	0.725513	0.82564
			5	0.817586	0.693356	0.687048	0.733258	0.69325	0.730918	0.836631
			average	0.794924	0.664949	0.665924	0.714108	0.674315	0.726612	0.827127

## Sheet: sheet 2
Figure	Dataset	number of nodes	index	AUROC	AUPR	Precision	Accuracy	F1 Score	Sensitivity	Specificity
Fig. 6c	A6	3	1	0.942536	0.849464	0.797242	0.84764	0.798258	0.801262	0.918272
			2	0.94916	0.846602	0.804646	0.854077	0.809754	0.815492	0.923885
			3	0.947077	0.848423	0.806854	0.856223	0.816214	0.830029	0.929701
			4	0.934751	0.83066	0.799516	0.851931	0.802294	0.805359	0.922014
			5	0.941114	0.845609	0.787166	0.843348	0.795608	0.806098	0.920714
			average	0.942928	0.844152	0.799085	0.850644	0.804426	0.811648	0.922917
		4	1	0.933669	0.815165	0.793156	0.845494	0.796919	0.802895	0.918199
			2	0.932712	0.824399	0.779229	0.834764	0.787115	0.796767	0.916149
			3	0.929474	0.816657	0.765232	0.828326	0.772801	0.782538	0.913454
			4	0.939132	0.827595	0.805506	0.856223	0.807972	0.810841	0.924415
			5	0.935382	0.818884	0.790386	0.843348	0.799689	0.812012	0.921061
			average	0.934074	0.82054	0.786702	0.841631	0.792899	0.801011	0.918656
		5	1	0.938514	0.844825	0.789771	0.841202	0.795247	0.803388	0.917612
			2	0.938233	0.847048	0.768927	0.824034	0.779744	0.796368	0.914319
			3	0.938659	0.841709	0.796269	0.84764	0.805132	0.816046	0.922437
			4	0.938749	0.846389	0.786077	0.841202	0.791325	0.797537	0.917376
			5	0.927075	0.821399	0.762228	0.824034	0.771144	0.783093	0.913656
			average	0.936246	0.840274	0.780655	0.835622	0.788519	0.799286	0.91708
Fig. 6d	A7	3	1	0.948708	0.768547	0.745128	0.783689	0.739522	0.738205	0.968695
			2	0.945477	0.762915	0.740455	0.782609	0.734517	0.731293	0.968414
			3	0.95074	0.768976	0.737918	0.777208	0.730173	0.72441	0.967678
			4	0.942887	0.760203	0.750809	0.786119	0.739017	0.730986	0.968714
			5	0.949048	0.769553	0.7439	0.780178	0.736417	0.731013	0.968016
			average	0.947372	0.766039	0.743642	0.781961	0.735929	0.731181	0.968303
		4	1	0.938951	0.754486	0.735518	0.781528	0.728413	0.724784	0.968075
			2	0.938446	0.756511	0.73758	0.775857	0.732532	0.728839	0.967335
			3	0.938971	0.752268	0.730498	0.775317	0.719751	0.715355	0.966976
			4	0.940827	0.754434	0.744099	0.779908	0.733474	0.725797	0.967856
			5	0.940335	0.752155	0.726995	0.771537	0.722373	0.719189	0.966785
			average	0.939506	0.753971	0.734938	0.77683	0.727309	0.722793	0.967405
		5	1	0.947419	0.759208	0.726074	0.771267	0.721225	0.718718	0.966798
			2	0.942502	0.753632	0.730087	0.771537	0.719864	0.712754	0.96674
			3	0.94686	0.759652	0.730035	0.769916	0.726904	0.725111	0.966666
			4	0.939066	0.745323	0.721703	0.769646	0.714668	0.709537	0.966507
			5	0.937375	0.747447	0.740666	0.774237	0.7201	0.710319	0.966834
			average	0.942645	0.753052	0.729713	0.771321	0.720552	0.715288	0.966709
Fig. 6e	A8	3	1	0.997596	0.986156	0.965899	0.965833	0.965724	0.965833	0.995119
			2	0.997627	0.985821	0.960881	0.960667	0.960676	0.960667	0.994381
			3	0.99767	0.9869	0.965739	0.965667	0.965692	0.965667	0.995095
			4	0.997435	0.985477	0.96326	0.963	0.963038	0.963	0.994714
			5	0.997523	0.985765	0.960927	0.960833	0.960658	0.960833	0.994405
			average	0.99757	0.986024	0.963341	0.9632	0.963158	0.9632	0.994743
		4	1	0.997763	0.98656	0.96028	0.960333	0.960272	0.960333	0.994333
			2	0.997825	0.987521	0.966954	0.966833	0.966793	0.966833	0.995262
			3	0.997843	0.986783	0.964335	0.964167	0.96419	0.964167	0.994881
			4	0.997742	0.986309	0.962798	0.962833	0.962725	0.962833	0.99469
			5	0.997575	0.985463	0.961016	0.960667	0.960625	0.960667	0.994381
			average	0.99775	0.986527	0.963076	0.962967	0.962921	0.962967	0.99471
		5	1	0.997496	0.985168	0.960103	0.96	0.959846	0.96	0.994286
			2	0.997754	0.986985	0.963041	0.962667	0.962707	0.962667	0.994667
			3	0.99732	0.984091	0.961289	0.961167	0.961128	0.961167	0.994452
			4	0.997433	0.985342	0.959229	0.959333	0.959266	0.959333	0.99419
			5	0.997376	0.985091	0.962872	0.962667	0.962732	0.962667	0.994667
			average	0.997476	0.985335	0.961307	0.961167	0.961136	0.961167	0.994452
Fig. 6h	A6	3	1	0.916297	0.775638	0.751945	0.813305	0.760272	0.772314	0.906541
			2	0.930134	0.815671	0.794322	0.839056	0.800721	0.811182	0.91661
			3	0.933368	0.834463	0.78277	0.834764	0.789015	0.798339	0.916133
			4	0.918681	0.785154	0.748543	0.809013	0.759369	0.775702	0.906838
			5	0.942447	0.848307	0.807537	0.854077	0.811683	0.82002	0.926126
			average	0.928185	0.811846	0.777023	0.830043	0.784212	0.795511	0.91445
		4	1	0.93687	0.846688	0.785464	0.841202	0.788816	0.79307	0.915909
			2	0.936302	0.837778	0.789002	0.845494	0.794665	0.801509	0.920676
			3	0.934104	0.836811	0.797655	0.849785	0.800605	0.804096	0.920932
			4	0.937647	0.838554	0.797254	0.84764	0.806841	0.819065	0.923336
			5	0.923515	0.815373	0.755656	0.819743	0.759796	0.765722	0.905844
			average	0.933688	0.835041	0.785006	0.840773	0.790145	0.796693	0.917339
		5	1	0.949564	0.868865	0.818523	0.866953	0.823953	0.830367	0.931877
			2	0.939348	0.848917	0.786467	0.841202	0.795249	0.806345	0.919632
			3	0.949215	0.870485	0.833225	0.875537	0.839731	0.847306	0.935875
			4	0.94776	0.864641	0.822959	0.864807	0.824575	0.826271	0.926835
			5	0.94789	0.863504	0.808025	0.858369	0.814691	0.823807	0.928668
			average	0.946756	0.863282	0.81384	0.861373	0.81964	0.826819	0.928577
Fig. 6i	A7	3	1	0.944751	0.756059	0.747716	0.783959	0.739462	0.733461	0.968595
			2	0.943435	0.757416	0.738073	0.777748	0.727981	0.72138	0.967568
			3	0.946171	0.759432	0.73446	0.776398	0.729849	0.727428	0.967661
			4	0.944726	0.759332	0.744937	0.785309	0.734426	0.727942	0.968615
			5	0.938869	0.754022	0.747903	0.786659	0.737677	0.732213	0.968867
			average	0.94359	0.757252	0.742618	0.782015	0.733879	0.728485	0.968261
		4	1	0.947874	0.771504	0.767632	0.797462	0.744718	0.738112	0.970101
			2	0.947042	0.767577	0.74752	0.7899	0.73999	0.734704	0.969407
			3	0.951688	0.771627	0.746263	0.784499	0.740379	0.736698	0.968722
			4	0.951465	0.772224	0.742299	0.783149	0.736472	0.733031	0.968484
			5	0.945598	0.760843	0.75048	0.779908	0.742739	0.73687	0.968104
			average	0.948733	0.768755	0.750839	0.786984	0.74086	0.735883	0.968964
		5	1	0.946009	0.754724	0.728481	0.772077	0.720538	0.715906	0.966741
			2	0.940779	0.757592	0.743622	0.782339	0.729445	0.722794	0.968057
			3	0.942031	0.759172	0.746046	0.782879	0.735978	0.729349	0.968241
			4	0.945648	0.759076	0.741833	0.778558	0.731966	0.726017	0.96792
			5	0.936912	0.757317	0.75325	0.78747	0.736576	0.728092	0.968891
			average	0.942276	0.757576	0.742646	0.780664	0.730901	0.724431	0.96797
Fig. 6j	A8	3	1	0.997929	0.987899	0.964151	0.963833	0.963834	0.963833	0.994833
			2	0.997687	0.986478	0.962872	0.962833	0.962771	0.962833	0.99469
			3	0.997388	0.984256	0.964476	0.9645	0.964408	0.9645	0.994929
			4	0.997732	0.986251	0.963671	0.963667	0.963591	0.963667	0.99481
			5	0.997165	0.985485	0.961666	0.961667	0.961631	0.961667	0.994524
			average	0.99758	0.986074	0.963367	0.9633	0.963247	0.9633	0.994757
		4	1	0.997308	0.98471	0.960654	0.960667	0.960585	0.960667	0.994381
			2	0.99763	0.986006	0.963384	0.963333	0.963241	0.963333	0.994762
			3	0.997419	0.98493	0.962256	0.962333	0.962271	0.962333	0.994619
			4	0.997624	0.985481	0.963192	0.963167	0.963097	0.963167	0.994738
			5	0.997528	0.985102	0.963297	0.963167	0.963161	0.963167	0.994738
			average	0.997502	0.985246	0.962557	0.962533	0.962471	0.962533	0.994648
		5	1	0.997719	0.986891	0.962105	0.962	0.962005	0.962	0.994571
			2	0.997526	0.985279	0.964162	0.964	0.963947	0.964	0.994857
			3	0.997584	0.985781	0.960571	0.960667	0.960561	0.960667	0.994381
			4	0.99769	0.986629	0.960965	0.960333	0.960328	0.960333	0.994333
			5	0.997489	0.986201	0.962302	0.962167	0.962139	0.962167	0.994595
			average	0.997602	0.986156	0.962021	0.961833	0.961796	0.961833	0.994548
Fig. 6m	A6	3	1	0.942703	0.851604	0.811355	0.858369	0.822495	0.837205	0.930009
			2	0.949286	0.867361	0.808804	0.856223	0.819321	0.832924	0.927791
			3	0.931782	0.81879	0.772359	0.82618	0.78208	0.796121	0.913145
			4	0.938239	0.837745	0.807112	0.856223	0.809631	0.812289	0.923279
			5	0.924127	0.802879	0.763049	0.819743	0.771479	0.785096	0.911918
			average	0.937228	0.835676	0.792536	0.843348	0.801001	0.812727	0.921229
		4	1	0.940099	0.830449	0.782087	0.839056	0.793516	0.809425	0.921137
			2	0.929366	0.828614	0.760245	0.815451	0.766474	0.781186	0.911994
			3	0.914425	0.777969	0.751438	0.813305	0.761356	0.77678	0.910154
			4	0.938417	0.833001	0.79364	0.84764	0.799608	0.8073	0.922989
			5	0.933428	0.827032	0.787237	0.841202	0.797963	0.812259	0.92132
			average	0.931147	0.819413	0.774929	0.83133	0.783783	0.79739	0.917519
		5	1	0.944116	0.855387	0.802747	0.851931	0.804791	0.80693	0.921336
			2	0.927225	0.831969	0.764607	0.817597	0.776202	0.795475	0.911057
			3	0.942264	0.858993	0.823101	0.871245	0.826845	0.831321	0.932464
			4	0.945067	0.853719	0.825898	0.866953	0.815419	0.809669	0.924888
			5	0.949318	0.868949	0.810737	0.862661	0.816706	0.823499	0.930943
			average	0.941598	0.853804	0.805418	0.854077	0.807992	0.813379	0.924137
Fig. 6n	A7	3	1	0.938853	0.756662	0.74846	0.786119	0.738596	0.732629	0.968728
			2	0.945496	0.754613	0.743322	0.777748	0.731884	0.724585	0.96752
			3	0.944319	0.763691	0.75639	0.7872	0.747379	0.741821	0.968978
			4	0.941449	0.757251	0.745689	0.776938	0.736098	0.731013	0.967535
			5	0.94113	0.754613	0.736084	0.773427	0.728633	0.722756	0.966995
			average	0.942249	0.757366	0.745989	0.780286	0.736518	0.730561	0.967951
		4	1	0.944504	0.758452	0.740154	0.777208	0.733966	0.729148	0.967644
			2	0.945324	0.761749	0.742155	0.778558	0.732915	0.726066	0.967846
			3	0.941147	0.760869	0.750642	0.78774	0.7403	0.734968	0.96889
			4	0.946113	0.764569	0.756087	0.786659	0.740462	0.730783	0.968652
			5	0.942167	0.749817	0.736195	0.770456	0.72592	0.719041	0.96677
			average	0.943851	0.759091	0.745047	0.780124	0.734713	0.728001	0.96796
		5	1	0.942627	0.753043	0.734632	0.771807	0.725254	0.721654	0.966874
			2	0.943058	0.757309	0.73361	0.778558	0.730596	0.728309	0.967887
			3	0.943561	0.761674	0.743413	0.779638	0.736975	0.735476	0.968107
			4	0.942854	0.751512	0.735569	0.776938	0.728042	0.724891	0.967618
			5	0.941888	0.762622	0.742889	0.782339	0.736529	0.731466	0.96838
			average	0.942798	0.757232	0.738023	0.777856	0.731479	0.728359	0.967773
Fig. 6o	A8	3	1	0.99753	0.986434	0.9653	0.965333	0.96524	0.965333	0.995048
			2	0.997582	0.986322	0.961675	0.961667	0.961649	0.961667	0.994524
			3	0.997538	0.985567	0.960876	0.960833	0.960825	0.960833	0.994405
			4	0.997529	0.986164	0.962774	0.962667	0.962704	0.962667	0.994667
			5	0.99759	0.987135	0.961412	0.961167	0.961059	0.961167	0.994452
			average	0.997554	0.986325	0.962407	0.962333	0.962295	0.962333	0.994619
		4	1	0.997581	0.98535	0.965832	0.965833	0.965742	0.965833	0.995119
			2	0.99753	0.985166	0.962578	0.9625	0.962403	0.9625	0.994643
			3	0.997634	0.986089	0.962312	0.962333	0.962294	0.962333	0.994619
			4	0.997554	0.985844	0.963628	0.963667	0.963581	0.963667	0.99481
			5	0.99767	0.985899	0.960878	0.960833	0.960813	0.960833	0.994405
			average	0.997594	0.98567	0.963046	0.963033	0.962966	0.963033	0.994719
		5	1	0.997307	0.983854	0.961329	0.961	0.960973	0.961	0.994429
			2	0.997607	0.986242	0.963437	0.963167	0.963073	0.963167	0.994738
			3	0.997509	0.984828	0.962351	0.962167	0.962026	0.962167	0.994595
			4	0.997322	0.983964	0.96341	0.963167	0.963165	0.963167	0.994738
			5	0.997395	0.98491	0.959934	0.96	0.959921	0.96	0.994286
			average	0.997428	0.98476	0.962092	0.9619	0.961832	0.9619	0.994557
ED Fig. 9d	A6	3	1	0.912813	0.788813	0.741318	0.802575	0.7514	0.766063	0.902345
			2	0.941486	0.849053	0.806798	0.856223	0.817496	0.831415	0.928817
			3	0.936713	0.842677	0.810175	0.856223	0.805588	0.802033	0.920581
			4	0.936133	0.839461	0.810007	0.856223	0.807378	0.805052	0.921244
			5	0.940494	0.835453	0.815551	0.860515	0.810854	0.808838	0.922982
			average	0.933528	0.831092	0.79677	0.846352	0.798543	0.80268	0.919194
		4	1	0.944911	0.852638	0.789567	0.843348	0.801243	0.817925	0.92398
			2	0.947483	0.852431	0.821766	0.864807	0.830182	0.842503	0.931789
			3	0.948922	0.866245	0.823734	0.869099	0.834533	0.849184	0.934884
			4	0.947081	0.853525	0.805436	0.854077	0.816228	0.830152	0.92682
			5	0.944753	0.850861	0.802486	0.856223	0.809874	0.819526	0.927349
			average	0.94663	0.85514	0.808598	0.857511	0.818412	0.831858	0.928964
		5	1	0.942893	0.840858	0.788421	0.839056	0.799874	0.815462	0.91967
			2	0.94538	0.855455	0.817054	0.864807	0.819975	0.823191	0.928302
			3	0.953419	0.869856	0.824091	0.864807	0.832125	0.842441	0.929423
			4	0.946402	0.854146	0.815926	0.860515	0.822412	0.830983	0.927243
			5	0.942765	0.845336	0.788136	0.845494	0.793693	0.800062	0.920897
			average	0.946172	0.85313	0.806726	0.854936	0.813616	0.822428	0.925107
ED Fig. 9e	A7	3	1	0.946827	0.768301	0.745774	0.785039	0.743208	0.741167	0.968853
			2	0.950079	0.769544	0.750591	0.78801	0.743744	0.739809	0.969311
			3	0.950312	0.772309	0.761652	0.793411	0.752273	0.74526	0.96984
			4	0.94949	0.767112	0.742253	0.780178	0.735254	0.730384	0.968094
			5	0.949394	0.764849	0.74473	0.781528	0.736701	0.732249	0.968139
			average	0.94922	0.768423	0.749	0.785633	0.742236	0.737774	0.968847
		4	1	0.952926	0.775255	0.758917	0.78774	0.749106	0.742311	0.969277
			2	0.955351	0.786379	0.768839	0.798542	0.755366	0.750621	0.970507
			3	0.952385	0.775146	0.754348	0.7872	0.752598	0.751721	0.969313
			4	0.953703	0.778559	0.755397	0.793681	0.748885	0.743705	0.970013
			5	0.949431	0.77227	0.759829	0.794491	0.746471	0.739787	0.969861
			average	0.952759	0.777522	0.759466	0.792331	0.750485	0.745629	0.969794
		5	1	0.954233	0.775735	0.753149	0.78936	0.744369	0.739392	0.969314
			2	0.955107	0.775154	0.748318	0.786929	0.742416	0.740379	0.969257
			3	0.954471	0.778581	0.760526	0.793681	0.749327	0.741253	0.969889
			4	0.949664	0.767348	0.746535	0.782609	0.738804	0.733413	0.968505
			5	0.952469	0.771551	0.749124	0.78882	0.738329	0.734641	0.969193
			average	0.953189	0.773674	0.75153	0.78828	0.742649	0.737816	0.969231
ED Fig. 9f	A8	3	1	0.997767	0.987296	0.963315	0.963167	0.963161	0.963167	0.994738
			2	0.997904	0.987146	0.965166	0.965	0.964999	0.965	0.995
			3	0.997665	0.986995	0.963022	0.962833	0.962847	0.962833	0.99469
			4	0.997778	0.987843	0.96412	0.964167	0.964121	0.964167	0.994881
			5	0.997773	0.987592	0.961275	0.961333	0.961181	0.961333	0.994476
			average	0.997777	0.987374	0.96338	0.9633	0.963262	0.9633	0.994757
		4	1	0.99808	0.988146	0.964143	0.964	0.963992	0.964	0.994857
			2	0.998089	0.987876	0.965627	0.9655	0.965374	0.9655	0.995071
			3	0.997683	0.987448	0.964998	0.964833	0.964893	0.964833	0.994976
			4	0.997811	0.987221	0.965357	0.965167	0.965169	0.965167	0.995024
			5	0.997335	0.985969	0.966009	0.965833	0.965735	0.965833	0.995119
			average	0.9978	0.987332	0.965227	0.965067	0.965033	0.965067	0.99501
		5	1	0.997876	0.987926	0.962539	0.9625	0.962403	0.9625	0.994643
			2	0.997954	0.9877	0.964596	0.9645	0.964505	0.9645	0.994929
			3	0.997721	0.98653	0.964391	0.963833	0.963944	0.963833	0.994833
			4	0.997552	0.986407	0.965332	0.965333	0.965248	0.965333	0.995048
			5	0.99757	0.987387	0.963814	0.963667	0.963661	0.963667	0.99481
			average	0.997735	0.98719	0.964134	0.963967	0.963952	0.963967	0.994852
ED Fig. 9j	A6	3	1	0.924951	0.809536	0.75636	0.809013	0.766158	0.786206	0.908968
			2	0.928966	0.824183	0.764321	0.817597	0.775878	0.795599	0.912303
			3	0.924267	0.809008	0.762504	0.817597	0.770349	0.780877	0.907002
			4	0.934114	0.823819	0.791296	0.839056	0.800179	0.817095	0.921911
			5	0.934131	0.831163	0.794526	0.845494	0.807122	0.825163	0.925299
			average	0.929286	0.819542	0.773802	0.825751	0.783937	0.800988	0.915096
		4	1	0.938342	0.818281	0.796513	0.849785	0.802718	0.811333	0.922967
			2	0.932901	0.825428	0.783056	0.843348	0.790736	0.80157	0.921172
			3	0.939662	0.826403	0.795508	0.84764	0.808443	0.827812	0.92728
			4	0.941402	0.821074	0.795035	0.845494	0.808991	0.832462	0.927997
			5	0.926577	0.808142	0.77012	0.830472	0.776324	0.7838	0.91228
			average	0.935777	0.819866	0.788046	0.843348	0.797443	0.811396	0.922339
		5	1	0.950508	0.859826	0.815989	0.860515	0.820624	0.826579	0.926706
			2	0.952223	0.861481	0.799765	0.849785	0.804627	0.81001	0.921153
			3	0.953887	0.871162	0.814217	0.860515	0.822466	0.832554	0.928836
			4	0.945881	0.848509	0.803023	0.845494	0.803851	0.809242	0.918626
			5	0.952151	0.863813	0.801604	0.851931	0.801842	0.80385	0.921462
			average	0.95093	0.860958	0.80692	0.853648	0.810682	0.816447	0.923356
ED Fig. 9k	A7	3	1	0.946022	0.758634	0.739552	0.775857	0.72935	0.72271	0.967305
			2	0.945812	0.758578	0.743669	0.783959	0.736398	0.730951	0.968523
			3	0.948084	0.76493	0.74447	0.777208	0.733437	0.730881	0.967643
			4	0.947749	0.763232	0.733254	0.778288	0.729393	0.726608	0.967913
			5	0.94373	0.763591	0.743472	0.776398	0.735238	0.729306	0.967459
			average	0.946279	0.761793	0.740883	0.778342	0.732763	0.728091	0.967768
		4	1	0.943117	0.76292	0.745423	0.781258	0.738647	0.733467	0.968288
			2	0.939	0.760475	0.749716	0.786659	0.736763	0.728396	0.968813
			3	0.943308	0.761954	0.747743	0.78747	0.741356	0.737758	0.969075
			4	0.945673	0.763938	0.758341	0.78909	0.746704	0.742023	0.969241
			5	0.94618	0.756689	0.738453	0.776938	0.733041	0.728793	0.967805
			average	0.943455	0.761195	0.747935	0.784283	0.739302	0.734087	0.968644
		5	1	0.944501	0.757857	0.734455	0.770186	0.731097	0.729513	0.966843
			2	0.942333	0.758728	0.743161	0.778018	0.735516	0.730372	0.967833
			3	0.943645	0.762119	0.752506	0.781258	0.736521	0.731402	0.96808
			4	0.940058	0.752067	0.735968	0.774507	0.722654	0.714301	0.96703
			5	0.945163	0.762661	0.742387	0.773427	0.728536	0.722306	0.966976
			average	0.94314	0.758686	0.741695	0.775479	0.730865	0.725579	0.967352
ED Fig. 9l	A8	3	1	0.997722	0.986864	0.960311	0.96	0.959991	0.96	0.994286
			2	0.997452	0.984599	0.963065	0.962667	0.962703	0.962667	0.994667
			3	0.997241	0.985132	0.961416	0.961167	0.960986	0.961167	0.994452
			4	0.997453	0.986063	0.962603	0.9625	0.962426	0.9625	0.994643
			5	0.997276	0.984348	0.960264	0.959833	0.959814	0.959833	0.994262
			average	0.997429	0.985401	0.961532	0.961233	0.961184	0.961233	0.994462
		4	1	0.997148	0.984274	0.962747	0.962167	0.9623	0.962167	0.994595
			2	0.997444	0.985124	0.961483	0.9615	0.961335	0.9615	0.9945
			3	0.997444	0.985627	0.962305	0.962167	0.962148	0.962167	0.994595
			4	0.997431	0.985707	0.961349	0.961333	0.961278	0.961333	0.994476
			5	0.9975	0.985377	0.963832	0.9635	0.963496	0.9635	0.994786
			average	0.997393	0.985222	0.962343	0.962133	0.962111	0.962133	0.99459
		5	1	0.997622	0.985819	0.96344	0.9635	0.963459	0.9635	0.994786
			2	0.997627	0.986144	0.962075	0.962	0.962006	0.962	0.994571
			3	0.997729	0.986366	0.961695	0.9615	0.961532	0.9615	0.9945
			4	0.997632	0.986415	0.962786	0.962667	0.962611	0.962667	0.994667
			5	0.99757	0.986576	0.962517	0.962333	0.962384	0.962333	0.994619
			average	0.997636	0.986264	0.962503	0.9624	0.962399	0.9624	0.994629
ED Fig. 9p	A6	3	1	0.951606	0.870457	0.809899	0.858369	0.817315	0.82695	0.928763
			2	0.941085	0.851	0.80436	0.856223	0.807497	0.810841	0.924747
			3	0.944498	0.851766	0.817682	0.858369	0.820396	0.829968	0.92818
			4	0.946187	0.856257	0.7883	0.845494	0.796781	0.807361	0.922696
			5	0.94066	0.843397	0.799581	0.849785	0.809924	0.823161	0.924087
			average	0.944807	0.854575	0.803964	0.853648	0.810383	0.819656	0.925695
		4	1	0.934761	0.813252	0.786875	0.839056	0.795677	0.809734	0.921579
			2	0.932715	0.8233	0.77023	0.82618	0.782943	0.80342	0.917326
			3	0.944406	0.842397	0.791745	0.84764	0.802012	0.815922	0.924582
			4	0.927177	0.813039	0.752305	0.802575	0.763491	0.786636	0.905027
			5	0.942822	0.846463	0.797258	0.849785	0.804497	0.814228	0.922399
			average	0.936376	0.82769	0.779683	0.833047	0.789724	0.805988	0.918183
		5	1	0.948899	0.869464	0.819439	0.862661	0.822607	0.826332	0.925753
			2	0.944601	0.863673	0.802369	0.849785	0.807375	0.812905	0.919796
			3	0.940602	0.83735	0.794801	0.84764	0.801247	0.808685	0.921191
			4	0.948401	0.853352	0.806688	0.854077	0.815059	0.82581	0.925573
			5	0.949854	0.866217	0.839261	0.875537	0.834927	0.833784	0.930132
			average	0.946471	0.858011	0.812512	0.85794	0.816243	0.821503	0.924489
ED Fig. 9q	A7	3	1	0.949478	0.768834	0.747867	0.786659	0.742937	0.739157	0.969017
			2	0.952273	0.772882	0.759607	0.79206	0.746776	0.740345	0.96965
			3	0.947533	0.763412	0.744678	0.774777	0.740292	0.738259	0.967527
			4	0.94631	0.771913	0.766111	0.793411	0.752187	0.742577	0.9698
			5	0.946546	0.765757	0.758365	0.7872	0.744719	0.73589	0.968988
			average	0.948428	0.76856	0.755326	0.786821	0.745382	0.739246	0.968996
		4	1	0.936892	0.75425	0.739441	0.780718	0.732294	0.727118	0.968098
			2	0.935788	0.758311	0.755977	0.785579	0.742069	0.732458	0.968663
			3	0.942647	0.760974	0.743937	0.785579	0.736057	0.73257	0.968773
			4	0.937425	0.759688	0.737693	0.775857	0.733816	0.732448	0.96756
			5	0.942456	0.754707	0.737444	0.772617	0.730544	0.725633	0.96713
			average	0.939041	0.757586	0.742898	0.78007	0.734956	0.730045	0.968045
		5	1	0.948844	0.762873	0.741756	0.781528	0.72863	0.722989	0.967991
			2	0.947596	0.76464	0.732364	0.772887	0.733773	0.736735	0.967402
			3	0.945998	0.757999	0.73842	0.777748	0.730877	0.724984	0.967706
			4	0.941792	0.755702	0.742357	0.778558	0.729807	0.722235	0.967578
			5	0.949076	0.762492	0.743323	0.781799	0.731524	0.723819	0.968159
			average	0.946661	0.760741	0.739644	0.778504	0.730922	0.726152	0.967767
ED Fig. 9r	A8	3	1	0.997896	0.987937	0.964146	0.964167	0.964119	0.964167	0.994881
			2	0.997652	0.986867	0.96539	0.965167	0.965209	0.965167	0.995024
			3	0.997888	0.987505	0.965568	0.9655	0.965458	0.9655	0.995071
			4	0.997857	0.987339	0.963403	0.963333	0.963317	0.963333	0.994762
			5	0.997541	0.986315	0.964986	0.964667	0.964618	0.964667	0.994952
			average	0.997767	0.987193	0.964699	0.964567	0.964544	0.964567	0.994938
		4	1	0.997559	0.985582	0.962326	0.962	0.961878	0.962	0.994571
			2	0.997502	0.984561	0.961734	0.9615	0.961406	0.9615	0.9945
			3	0.997411	0.984316	0.961368	0.9615	0.961397	0.9615	0.9945
			4	0.997571	0.985483	0.963221	0.963167	0.963166	0.963167	0.994738
			5	0.997403	0.984009	0.963617	0.963333	0.963356	0.963333	0.994762
			average	0.997489	0.98479	0.962453	0.9623	0.96224	0.9623	0.994614
		5	1	0.997821	0.987297	0.963144	0.963167	0.963071	0.963167	0.994738
			2	0.997727	0.987476	0.966249	0.966167	0.966132	0.966167	0.995167
			3	0.997696	0.987079	0.964356	0.963833	0.963973	0.963833	0.994833
			4	0.997422	0.98674	0.963963	0.963833	0.963853	0.963833	0.994833
			5	0.997594	0.98719	0.965926	0.966	0.965904	0.966	0.995143
			average	0.997652	0.987156	0.964728	0.9646	0.964587	0.9646	0.994943
ED Fig. 10c	C1	3	1	0.999693	0.999399	0.992235	0.992222	0.992221	0.992222	0.996111
			2	0.999695	0.999383	0.991116	0.991111	0.991112	0.991111	0.995556
			3	0.999728	0.99947	0.992042	0.992	0.992004	0.992	0.996
			4	0.999714	0.999433	0.992222	0.992222	0.992221	0.992222	0.996111
			5	0.999527	0.999062	0.99178	0.991778	0.991779	0.991778	0.995889
			average	0.999671	0.999349	0.991879	0.991867	0.991867	0.991867	0.995933
		4	1	0.999376	0.998792	0.989565	0.989556	0.989557	0.989556	0.994778
			2	0.999208	0.998439	0.989592	0.989556	0.989553	0.989556	0.994778
			3	0.999513	0.998983	0.987803	0.987778	0.987774	0.987778	0.993889
			4	0.999469	0.998876	0.991344	0.991333	0.991335	0.991333	0.995667
			5	0.999414	0.998847	0.987573	0.987556	0.987556	0.987556	0.993778
			average	0.999396	0.998788	0.989175	0.989156	0.989155	0.989156	0.994578
		5	1	0.99941	0.998829	0.989121	0.989111	0.989115	0.989111	0.994556
			2	0.999344	0.998635	0.989579	0.989556	0.989557	0.989556	0.994778
			3	0.999556	0.999098	0.989124	0.989111	0.989116	0.989111	0.994556
			4	0.999389	0.99881	0.988746	0.988667	0.988668	0.988667	0.994333
			5	0.99971	0.999426	0.992011	0.992	0.992	0.992	0.996
			average	0.999482	0.998959	0.989716	0.989689	0.989691	0.989689	0.994844
ED Fig. 10f	C1	3	1	0.999577	0.99915	0.988896	0.988889	0.988892	0.988889	0.994444
			2	0.999555	0.999121	0.990226	0.990222	0.990224	0.990222	0.995111
			3	0.999531	0.999073	0.990451	0.990444	0.990446	0.990444	0.995222
			4	0.9996	0.999222	0.992445	0.992444	0.992444	0.992444	0.996222
			5	0.999527	0.999053	0.989148	0.989111	0.989114	0.989111	0.994556
			average	0.999558	0.999124	0.990233	0.990222	0.990224	0.990222	0.995111
		4	1	0.999894	0.99979	0.992724	0.992667	0.992673	0.992667	0.996333
			2	0.99953	0.999123	0.988461	0.988444	0.988436	0.988444	0.994222
			3	0.999747	0.999502	0.991795	0.991778	0.99178	0.991778	0.995889
			4	0.999718	0.999441	0.992217	0.992222	0.992219	0.992222	0.996111
			5	0.999808	0.999624	0.991795	0.991778	0.991777	0.991778	0.995889
			average	0.999739	0.999496	0.991398	0.991378	0.991377	0.991378	0.995689
		5	1	0.999548	0.99911	0.989795	0.989778	0.989779	0.989778	0.994889
			2	0.999676	0.999358	0.991347	0.991333	0.991333	0.991333	0.995667
			3	0.999598	0.999205	0.991339	0.991333	0.991336	0.991333	0.995667
			4	0.999675	0.999358	0.990904	0.990889	0.99089	0.990889	0.995444
			5	0.9997	0.999413	0.991356	0.991333	0.991337	0.991333	0.995667
			average	0.999639	0.999289	0.990948	0.990933	0.990935	0.990933	0.995467
ED Fig. 10i	C1	3	1	0.999527	0.999044	0.992232	0.992222	0.992224	0.992222	0.996111
			2	0.999538	0.999091	0.988468	0.988444	0.988445	0.988444	0.994222
			3	0.999249	0.998492	0.988234	0.988222	0.988227	0.988222	0.994111
			4	0.999752	0.999512	0.992226	0.992222	0.992223	0.992222	0.996111
			5	0.999623	0.999244	0.990925	0.990889	0.990892	0.990889	0.995444
			average	0.999538	0.999076	0.990417	0.9904	0.990402	0.9904	0.9952
		4	1	0.999586	0.99916	0.988674	0.988667	0.988669	0.988667	0.994333
			2	0.999267	0.998552	0.986497	0.986444	0.986458	0.986444	0.993222
			3	0.999433	0.998881	0.988457	0.988444	0.988445	0.988444	0.994222
			4	0.999518	0.999044	0.989563	0.989556	0.989559	0.989556	0.994778
			5	0.999394	0.998769	0.990026	0.99	0.99	0.99	0.995
			average	0.99944	0.998881	0.988643	0.988622	0.988626	0.988622	0.994311
		5	1	0.999261	0.998503	0.988893	0.988889	0.988891	0.988889	0.994444
			2	0.999679	0.999364	0.992673	0.992667	0.992669	0.992667	0.996333
			3	0.999149	0.998225	0.988906	0.988889	0.988889	0.988889	0.994444
			4	0.999519	0.999044	0.991561	0.991556	0.991558	0.991556	0.995778
			5	0.999098	0.998205	0.98756	0.987556	0.987557	0.987556	0.993778
			average	0.999341	0.998668	0.989919	0.989911	0.989913	0.989911	0.994956
ED Fig. 11j	C1	3	1	0.999485	0.998952	0.987799	0.987778	0.987786	0.987778	0.993889
			2	0.99942	0.998857	0.990892	0.990889	0.990889	0.990889	0.995444
			3	0.999702	0.999413	0.993336	0.993333	0.993334	0.993333	0.996667
			4	0.999558	0.999151	0.991778	0.991778	0.991778	0.991778	0.995889
			5	0.999129	0.998376	0.989122	0.989111	0.989116	0.989111	0.994556
			average	0.999459	0.99895	0.990586	0.990578	0.990581	0.990578	0.995289
		4	1	0.999268	0.998528	0.987342	0.987333	0.987337	0.987333	0.993667
			2	0.999003	0.997999	0.988445	0.988444	0.988444	0.988444	0.994222
			3	0.999153	0.998324	0.986244	0.986222	0.98623	0.986222	0.993111
			4	0.999321	0.998654	0.988458	0.988444	0.988446	0.988444	0.994222
			5	0.999178	0.998358	0.98757	0.987556	0.987555	0.987556	0.993778
			average	0.999185	0.998372	0.987612	0.9876	0.987603	0.9876	0.9938
		5	1	0.998987	0.998006	0.98889	0.988889	0.988888	0.988889	0.994444
			2	0.999153	0.998287	0.985584	0.985556	0.985559	0.985556	0.992778
			3	0.999493	0.999001	0.988674	0.988667	0.988669	0.988667	0.994333
			4	0.99917	0.998319	0.988014	0.988	0.988002	0.988	0.994
			5	0.99922	0.998447	0.988243	0.988222	0.988225	0.988222	0.994111
			average	0.999204	0.998412	0.987881	0.987867	0.987868	0.987867	0.993933
ED Fig. 11k	C1	3	1	0.999531	0.999073	0.988253	0.988222	0.988223	0.988222	0.994111
			2	0.999369	0.998718	0.990903	0.990889	0.990889	0.990889	0.995444
			3	0.999458	0.998918	0.989342	0.989333	0.989335	0.989333	0.994667
			4	0.999418	0.998837	0.989356	0.989333	0.989339	0.989333	0.994667
			5	0.999265	0.99852	0.986702	0.986667	0.986676	0.986667	0.993333
			average	0.999408	0.998813	0.988911	0.988889	0.988893	0.988889	0.994444
		4	1	0.999135	0.99815	0.987115	0.987111	0.987111	0.987111	0.993556
			2	0.999233	0.998439	0.986301	0.986222	0.98622	0.986222	0.993111
			3	0.999463	0.998932	0.988687	0.988667	0.988667	0.988667	0.994333
			4	0.999456	0.998892	0.988676	0.988667	0.98867	0.988667	0.994333
			5	0.999091	0.998242	0.985661	0.985556	0.985554	0.985556	0.992778
			average	0.999276	0.998531	0.987288	0.987244	0.987244	0.987244	0.993622
		5	1	0.999157	0.998384	0.988454	0.988444	0.988448	0.988444	0.994222
			2	0.998898	0.997671	0.987329	0.987333	0.987331	0.987333	0.993667
			3	0.998881	0.997199	0.986449	0.986444	0.986446	0.986444	0.993222
			4	0.999523	0.999064	0.988328	0.988222	0.988224	0.988222	0.994111
			5	0.99956	0.999119	0.990018	0.99	0.990007	0.99	0.995
			average	0.999204	0.998287	0.988116	0.988089	0.988091	0.988089	0.994044
ED Fig. 11l	C1	3	1	0.999451	0.998901	0.991115	0.991111	0.991111	0.991111	0.995556
			2	0.999362	0.998618	0.989793	0.989778	0.989779	0.989778	0.994889
			3	0.999257	0.998465	0.990068	0.99	0.989997	0.99	0.995
			4	0.999492	0.998957	0.988904	0.988889	0.988886	0.988889	0.994444
			5	0.999385	0.998689	0.990897	0.990889	0.990891	0.990889	0.995444
			average	0.99939	0.998726	0.990155	0.990133	0.990133	0.990133	0.995067
		4	1	0.99929	0.998526	0.989144	0.989111	0.989113	0.989111	0.994556
			2	0.999197	0.998315	0.987124	0.987111	0.987117	0.987111	0.993556
			3	0.999287	0.99835	0.987359	0.987333	0.987338	0.987333	0.993667
			4	0.999092	0.997851	0.98824	0.988222	0.988226	0.988222	0.994111
			5	0.998887	0.997739	0.985167	0.985111	0.985117	0.985111	0.992556
			average	0.99915	0.998156	0.987407	0.987378	0.987382	0.987378	0.993689
		5	1	0.998962	0.99809	0.988462	0.988444	0.988449	0.988444	0.994222
			2	0.998887	0.997643	0.990452	0.990444	0.990446	0.990444	0.995222
			3	0.999422	0.998872	0.990681	0.990667	0.990669	0.990667	0.995333
			4	0.999381	0.998851	0.99179	0.991778	0.991781	0.991778	0.995889
			5	0.999412	0.998927	0.990677	0.990667	0.990671	0.990667	0.995333
			average	0.999213	0.998476	0.990412	0.9904	0.990403	0.9904	0.9952
