# Supplementary material
Source: Research Square preprint supplement (doi:10.21203/rs.3.rs-9436896/v1)
Supplement: Supplementary file 4 [file c434c6eb7aeebf2a93ea263a.xlsx]

## Sheet: model parameters
model	Prediction of	lora_r	lora_alpha	max_epochs	lr	patience	batch_size	dropout_rate
RETFound	ocular diseases	4	16	500	0.0001	20	32	0.3
CONCH	gastric carcinoma	2	8	500	1e-05	5	64/72	0.3
MUSK	lung cancer	4	16	500	0.0001	20	16	0.3
BiomedGPT	ocular diseases	4	16	500	0.0001	20	64	0.3
	gastric carcinoma	4	16	500	0.0001	20	32/96	0.3
	lung cancer	4	16	500	0.0001	20	32/96	0.3
F2Med	ocular diseases	8	16	500	0.0001	20	64	0.15
	gastric carcinoma	4	16	500	0.0001	20	64	0.15
	lung cancer	8	16	500	0.0001	20	64	0.15
